# Supplementary material for: Consumers’ Understanding of Ultra-Processed Foods
Source: MDPI journal article supplement (doi:10.3390/foods11091359), 2022-05-07
Supplement: s1 [file s1]

Table S1 Quiz Summary

| Respondent ID | Quiz Summary |        |            | Quiz Results |           |                 | Do you know what         | Did you already       |
|---------------|--------------|--------|------------|--------------|-----------|-----------------|--------------------------|-----------------------|
|               | Score        | Points | Percentile | Correct      | Incorrect | Total_Questions | is ultra-processed food? | know this definition? |
|               | 80%          | 8/10   | 88%        | 8            | 2         | 10              | Yes                      | No                    |
|               | 50%          | 5/10   | 27%        | 5            | 5         | 10              | Yes                      | No                    |
|               | 70%          | 7/10   | 68%        | 7            | 3         | 10              | Yes                      | No                    |
|               | 60%          | 6/10   | 46%        | 6            | 4         | 10              | Yes                      | Yes                   |
|               | 90%          | 9/10   | 99%        | 9            | 1         | 10              | Yes                      | No                    |
|               | 50%          | 5/10   | 27%        | 5            | 5         | 10              | Yes                      | Yes                   |
|               | 40%          | 4/10   | 12%        | 4            | 6         | 10              | Yes                      | No                    |
|               | 50%          | 5/10   | 27%        | 5            | 5         | 10              | Yes                      | No                    |
|               | 80%          | 8/10   | 88%        | 8            | 2         | 10              | Yes                      | No                    |
|               | 80%          | 8/10   | 88%        | 8            | 2         | 10              | Yes                      | No                    |
|               | 40%          | 4/10   | 12%        | 4            | 6         | 10              | No                       | No                    |
|               | 60%          | 6/10   | 46%        | 6            | 4         | 10              | Yes                      | No                    |
|               | 80%          | 8/10   | 88%        | 8            | 2         | 10              | Yes                      | Yes                   |
|               | 60%          | 6/10   | 46%        | 6            | 4         | 10              | Yes                      | No                    |
|               | 90%          | 9/10   | 99%        | 9            | 1         | 10              | Yes                      | Yes                   |
|               | 90%          | 9/10   | 99%        | 9            | 1         | 10              | Yes                      | No                    |
|               | 60%          | 6/10   | 46%        | 6            | 4         | 10              | Yes                      | Yes                   |
|               | 50%          | 5/10   | 27%        | 5            | 5         | 10              | Yes                      | No                    |
|               | 50%          | 5/10   | 27%        | 5            | 5         | 10              | Yes                      | No                    |
|               | 60%          | 6/10   | 46%        | 6            | 4         | 10              | No                       | No                    |
|               | 50%          | 5/10   | 27%        | 5            | 5         | 10              | Yes                      | No                    |
|               | 80%          | 8/10   | 88%        | 8            | 2         | 10              | Yes                      | Yes                   |
|               | 50%          | 5/10   | 27%        | 5            | 5         | 10              | No                       | No                    |
|               | 90%          | 9/10   | 99%        | 9            | 1         | 10              | No                       | No                    |
|               | 40%          | 4/10   | 12%        | 4            | 6         | 10              | Yes                      | Yes                   |
|               | 60%          | 6/10   | 46%        | 6            | 4         | 10              | Yes                      | No                    |
|               | 50%          | 5/10   | 27%        | 5            | 5         | 10              | Yes                      | No                    |
|               | 70%          | 7/10   | 68%        | 7            | 3         | 10              | Yes                      | Yes                   |
|               | 50%          | 5/10   | 27%        | 5            | 5         | 10              | Yes                      | No                    |
|               | 80%          | 8/10   | 88%        | 8            | 2         | 10              | Yes                      | No                    |
|               | 90%          | 9/10   | 99%        | 9            | 1         | 10              | Yes                      | No                    |
|               | 50%          | 5/10   | 27%        | 5            | 5         | 10              | Yes                      | No                    |
|               | 70%          | 7/10   | 68%        | 7            | 3         | 10              | Yes                      | No                    |
|               | 90%          | 9/10   | 99%        | 9            | 1         | 10              | Yes                      | No                    |
|               | 60%          | 6/10   | 46%        | 6            | 4         | 10              | Yes                      | Yes                   |
|               | 50%          | 5/10   | 27%        | 5            | 5         | 10              | Yes                      | Yes                   |
|               | 60%          | 6/10   | 46%        | 6            | 4         | 10              | Yes                      | Yes                   |
|               | 80%          | 8/10   | 88%        | 8            | 2         | 10              | Yes                      | No                    |
|               | 90%          | 9/10   | 99%        | 9            | 1         | 10              | Yes                      | No                    |
|               | 80%          | 8/10   | 88%        | 8            | 2         | 10              | No                       | No                    |
|               | 70%          | 7/10   | 68%        | 7            | 3         | 10              | Yes                      | No                    |
|               | 50%          | 5/10   | 27%        | 5            | 5         | 10              | Yes                      | No                    |
|               | 50%          | 5/10   | 27%        | 5            | 5         | 10              | Yes                      | Yes                   |
|               | 70%          | 7/10   | 68%        | 7            | 3         | 10              | Yes                      | No                    |
|               | 30%          | 3/10   | 4%         | 3            | 7         | 10              | Yes                      | No                    |

Table S1 Quiz Summary

| Respondent ID | Quiz Summary |        |            | Quiz Results |           |                 | Do you know what         | Did you already       |
|---------------|--------------|--------|------------|--------------|-----------|-----------------|--------------------------|-----------------------|
|               | Score        | Points | Percentile | Correct      | Incorrect | Total_Questions | is ultra-processed food? | know this definition? |
|               | 90%          | 9/10   | 99%        | 9            | 1         | 10              | Yes                      | Yes                   |
|               | 30%          | 3/10   | 4%         | 3            | 7         | 10              | Yes                      | No                    |
|               | 90%          | 9/10   | 99%        | 9            | 1         | 10              | Yes                      | Yes                   |
|               | 80%          | 8/10   | 88%        | 8            | 2         | 10              | Yes                      | Yes                   |
|               | 60%          | 6/10   | 46%        | 6            | 4         | 10              | Yes                      | No                    |
|               | 90%          | 9/10   | 99%        | 9            | 1         | 10              | Yes                      | No                    |
|               | 80%          | 8/10   | 88%        | 8            | 2         | 10              | Yes                      | No                    |
|               | 50%          | 5/10   | 27%        | 5            | 5         | 10              | Yes                      | Yes                   |
|               | 60%          | 6/10   | 46%        | 6            | 4         | 10              | Yes                      | Yes                   |
|               | 60%          | 6/10   | 46%        | 6            | 4         | 10              | Yes                      | No                    |
|               | 60%          | 6/10   | 46%        | 6            | 4         | 10              | Yes                      | No                    |
|               | 50%          | 5/10   | 27%        | 5            | 5         | 10              | Yes                      | No                    |
|               | 60%          | 6/10   | 46%        | 6            | 4         | 10              | Yes                      | Yes                   |
|               | 60%          | 6/10   | 46%        | 6            | 4         | 10              | Yes                      | Yes                   |
|               | 50%          | 5/10   | 27%        | 5            | 5         | 10              | Yes                      | Yes                   |
|               | 80%          | 8/10   | 88%        | 8            | 2         | 10              | Yes                      | No                    |
|               | 40%          | 4/10   | 12%        | 4            | 6         | 10              | Yes                      | No                    |
|               | 70%          | 7/10   | 68%        | 7            | 3         | 10              | Yes                      | Yes                   |
|               | 70%          | 7/10   | 68%        | 7            | 3         | 10              | Yes                      | No                    |
|               | 70%          | 7/10   | 68%        | 7            | 3         | 10              | Yes                      | No                    |
|               | 50%          | 5/10   | 27%        | 5            | 5         | 10              | Yes                      | Yes                   |
|               | 60%          | 6/10   | 46%        | 6            | 4         | 10              | Yes                      | Yes                   |
|               | 70%          | 7/10   | 68%        | 7            | 3         | 10              | Yes                      | Yes                   |
|               | 80%          | 8/10   | 88%        | 8            | 2         | 10              | Yes                      | No                    |
|               | 80%          | 8/10   | 88%        | 8            | 2         | 10              | Yes                      | No                    |
|               | 80%          | 8/10   | 88%        | 8            | 2         | 10              | Yes                      | No                    |
|               | 60%          | 6/10   | 46%        | 6            | 4         | 10              | No                       | No                    |
|               | 80%          | 8/10   | 88%        | 8            | 2         | 10              | Yes                      | Yes                   |
|               | 50%          | 5/10   | 27%        | 5            | 5         | 10              | No                       | No                    |
|               | 70%          | 7/10   | 68%        | 7            | 3         | 10              | Yes                      | Yes                   |
|               | 60%          | 6/10   | 46%        | 6            | 4         | 10              | No                       | No                    |
|               | 70%          | 7/10   | 68%        | 7            | 3         | 10              | Yes                      | No                    |
|               | 40%          | 4/10   | 12%        | 4            | 6         | 10              | No                       | No                    |
|               | 60%          | 6/10   | 46%        | 6            | 4         | 10              | No                       | No                    |
|               | 60%          | 6/10   | 46%        | 6            | 4         | 10              | No                       | No                    |
|               | 70%          | 7/10   | 68%        | 7            | 3         | 10              | Yes                      | Yes                   |
|               | 80%          | 8/10   | 88%        | 8            | 2         | 10              | Yes                      | Yes                   |
|               | 80%          | 8/10   | 88%        | 8            | 2         | 10              | Yes                      | No                    |
|               | 70%          | 7/10   | 68%        | 7            | 3         | 10              | Yes                      | No                    |
|               | 90%          | 9/10   | 99%        | 9            | 1         | 10              | Yes                      | Yes                   |
|               | 50%          | 5/10   | 27%        | 5            | 5         | 10              | No                       | No                    |
|               | 80%          | 8/10   | 88%        | 8            | 2         | 10              | Yes                      | No                    |
|               | 50%          | 5/10   | 27%        | 5            | 5         | 10              | Yes                      | No                    |
|               | 60%          | 6/10   | 46%        | 6            | 4         | 10              | Yes                      | No                    |
|               | 60%          | 6/10   | 46%        | 6            | 4         | 10              | Yes                      | No                    |

Table S1 Quiz Summary

| Respondent ID | Quiz Summary |        |            | Quiz Results |           |                 | Do you know what         | Did you already       |
|---------------|--------------|--------|------------|--------------|-----------|-----------------|--------------------------|-----------------------|
|               | Score        | Points | Percentile | Correct      | Incorrect | Total_Questions | is ultra-processed food? | know this definition? |
|               | 60%          | 6/10   | 46%        | 6            | 4         | 10              | Yes                      | Yes                   |
|               | 60%          | 6/10   | 46%        | 6            | 4         | 10              | Yes                      | No                    |
|               | 60%          | 6/10   | 46%        | 6            | 4         | 10              | Yes                      | No                    |
|               | 90%          | 9/10   | 99%        | 9            | 1         | 10              | Yes                      | Yes                   |
|               | 50%          | 5/10   | 27%        | 5            | 5         | 10              | Yes                      | No                    |
|               | 60%          | 6/10   | 46%        | 6            | 4         | 10              | Yes                      | No                    |
|               | 90%          | 9/10   | 99%        | 9            | 1         | 10              | Yes                      | No                    |
|               | 70%          | 7/10   | 68%        | 7            | 3         | 10              | Yes                      | No                    |
|               | 80%          | 8/10   | 88%        | 8            | 2         | 10              | Yes                      | No                    |
|               | 70%          | 7/10   | 68%        | 7            | 3         | 10              | No                       | No                    |
|               | 90%          | 9/10   | 99%        | 9            | 1         | 10              | Yes                      | No                    |
|               | 70%          | 7/10   | 68%        | 7            | 3         | 10              | No                       | No                    |
|               | 80%          | 8/10   | 88%        | 8            | 2         | 10              | Yes                      | No                    |
|               | 90%          | 9/10   | 99%        | 9            | 1         | 10              | Yes                      | No                    |
|               | 50%          | 5/10   | 27%        | 5            | 5         | 10              | Yes                      | No                    |
|               | 40%          | 4/10   | 12%        | 4            | 6         | 10              | Yes                      | No                    |
|               | 70%          | 7/10   | 68%        | 7            | 3         | 10              | Yes                      | No                    |
|               | 80%          | 8/10   | 88%        | 8            | 2         | 10              | No                       | No                    |
|               | 50%          | 5/10   | 27%        | 5            | 5         | 10              | Yes                      | Yes                   |
|               | 80%          | 8/10   | 88%        | 8            | 2         | 10              | Yes                      | Yes                   |
|               | 60%          | 6/10   | 46%        | 6            | 4         | 10              | Yes                      | No                    |
|               | 90%          | 9/10   | 99%        | 9            | 1         | 10              | Yes                      | Yes                   |
|               | 90%          | 9/10   | 99%        | 9            | 1         | 10              | Yes                      | Yes                   |
|               | 70%          | 7/10   | 68%        | 7            | 3         | 10              | Yes                      | Yes                   |
|               | 90%          | 9/10   | 99%        | 9            | 1         | 10              | Yes                      | Yes                   |
|               | 70%          | 7/10   | 68%        | 7            | 3         | 10              | Yes                      | No                    |
|               | 80%          | 8/10   | 88%        | 8            | 2         | 10              | Yes                      | Yes                   |
|               | 60%          | 6/10   | 46%        | 6            | 4         | 10              | No                       | No                    |
|               | 80%          | 8/10   | 88%        | 8            | 2         | 10              | Yes                      | No                    |
|               | 70%          | 7/10   | 68%        | 7            | 3         | 10              | Yes                      | No                    |
|               | 80%          | 8/10   | 88%        | 8            | 2         | 10              | Yes                      | No                    |
|               | 50%          | 5/10   | 27%        | 5            | 5         | 10              | No                       | No                    |
|               | 60%          | 6/10   | 46%        | 6            | 4         | 10              | Yes                      | No                    |
|               | 40%          | 4/10   | 12%        | 4            | 6         | 10              | No                       | No                    |
|               | 40%          | 4/10   | 12%        | 4            | 6         | 10              | Yes                      | No                    |
|               | 90%          | 9/10   | 99%        | 9            | 1         | 10              | No                       | No                    |
|               | 70%          | 7/10   | 68%        | 7            | 3         | 10              | Yes                      | Yes                   |
|               | 90%          | 9/10   | 99%        | 9            | 1         | 10              | Yes                      | No                    |
|               | 70%          | 7/10   | 68%        | 7            | 3         | 10              | No                       | No                    |
|               | 60%          | 6/10   | 46%        | 6            | 4         | 10              | No                       | No                    |
|               | 80%          | 8/10   | 88%        | 8            | 2         | 10              | No                       | No                    |
|               | 70%          | 7/10   | 68%        | 7            | 3         | 10              | Yes                      | No                    |
|               | 80%          | 8/10   | 88%        | 8            | 2         | 10              | No                       | No                    |
|               | 50%          | 5/10   | 27%        | 5            | 5         | 10              | No                       | No                    |
|               | 60%          | 6/10   | 46%        | 6            | 4         | 10              | Yes                      | No                    |

Table S1 Quiz Summary

| Respondent ID | Quiz Summary |        |            | Quiz Results |           |                 | Do you know what         | Did you already       |
|---------------|--------------|--------|------------|--------------|-----------|-----------------|--------------------------|-----------------------|
|               | Score        | Points | Percentile | Correct      | Incorrect | Total_Questions | is ultra-processed food? | know this definition? |
|               | 50%          | 5/10   | 27%        | 5            | 5         | 10              | Yes                      | No                    |
|               | 90%          | 9/10   | 99%        | 9            | 1         | 10              | Yes                      | Yes                   |
|               | 70%          | 7/10   | 68%        | 7            | 3         | 10              | Yes                      | Yes                   |
|               | 40%          | 4/10   | 12%        | 4            | 6         | 10              | Yes                      | No                    |
|               | 90%          | 9/10   | 99%        | 9            | 1         | 10              | No                       | No                    |
|               | 60%          | 6/10   | 46%        | 6            | 4         | 10              | Yes                      | Yes                   |
|               | 70%          | 7/10   | 68%        | 7            | 3         | 10              | Yes                      | No                    |
|               | 40%          | 4/10   | 12%        | 4            | 6         | 10              | No                       | No                    |
|               | 60%          | 6/10   | 46%        | 6            | 4         | 10              | No                       | No                    |
|               | 90%          | 9/10   | 99%        | 9            | 1         | 10              | Yes                      | Yes                   |
|               | 70%          | 7/10   | 68%        | 7            | 3         | 10              | Yes                      | No                    |
|               | 70%          | 7/10   | 68%        | 7            | 3         | 10              | No                       | No                    |
|               | 50%          | 5/10   | 27%        | 5            | 5         | 10              | No                       | No                    |
|               | 50%          | 5/10   | 27%        | 5            | 5         | 10              | Yes                      | No                    |
|               | 70%          | 7/10   | 68%        | 7            | 3         | 10              | Yes                      | No                    |
|               | 50%          | 5/10   | 27%        | 5            | 5         | 10              | Yes                      | No                    |
|               | 60%          | 6/10   | 46%        | 6            | 4         | 10              | Yes                      | No                    |
|               | 80%          | 8/10   | 88%        | 8            | 2         | 10              | Yes                      | Yes                   |
|               | 60%          | 6/10   | 46%        | 6            | 4         | 10              | Yes                      | No                    |
|               | 80%          | 8/10   | 88%        | 8            | 2         | 10              | No                       | No                    |
|               | 70%          | 7/10   | 68%        | 7            | 3         | 10              | No                       | No                    |
|               | 30%          | 3/10   | 4%         | 3            | 7         | 10              | Yes                      | No                    |
|               | 70%          | 7/10   | 68%        | 7            | 3         | 10              | Yes                      | No                    |
|               | 50%          | 5/10   | 27%        | 5            | 5         | 10              | No                       | No                    |
|               | 60%          | 6/10   | 46%        | 6            | 4         | 10              | Yes                      | No                    |
|               | 70%          | 7/10   | 68%        | 7            | 3         | 10              | No                       | No                    |
|               | 60%          | 6/10   | 46%        | 6            | 4         | 10              | No                       | No                    |
|               | 60%          | 6/10   | 46%        | 6            | 4         | 10              | Yes                      | Yes                   |
|               | 90%          | 9/10   | 99%        | 9            | 1         | 10              | Yes                      | Yes                   |
|               | 80%          | 8/10   | 88%        | 8            | 2         | 10              | Yes                      | No                    |
|               | 40%          | 4/10   | 12%        | 4            | 6         | 10              | Yes                      | No                    |
|               | 80%          | 8/10   | 88%        | 8            | 2         | 10              | Yes                      | Yes                   |
|               | 70%          | 7/10   | 68%        | 7            | 3         | 10              | Yes                      | Yes                   |
|               | 60%          | 6/10   | 46%        | 6            | 4         | 10              | Yes                      | No                    |
|               | 80%          | 8/10   | 88%        | 8            | 2         | 10              | Yes                      | Yes                   |
|               | 60%          | 6/10   | 46%        | 6            | 4         | 10              | Yes                      | Yes                   |
|               | 60%          | 6/10   | 46%        | 6            | 4         | 10              | Yes                      | No                    |
|               | 80%          | 8/10   | 88%        | 8            | 2         | 10              | Yes                      | No                    |
|               | 60%          | 6/10   | 46%        | 6            | 4         | 10              | Yes                      | No                    |
|               | 80%          | 8/10   | 88%        | 8            | 2         | 10              | Yes                      | No                    |
|               | 50%          | 5/10   | 27%        | 5            | 5         | 10              | Yes                      | No                    |
|               | 70%          | 7/10   | 68%        | 7            | 3         | 10              | Yes                      | No                    |
|               | 60%          | 6/10   | 46%        | 6            | 4         | 10              | Yes                      | No                    |
|               | 70%          | 7/10   | 68%        | 7            | 3         | 10              | No                       | No                    |
|               | 60%          | 6/10   | 46%        | 6            | 4         | 10              | Yes                      | No                    |

Table S1 Quiz Summary

| Respondent ID | Quiz Summary |        |            | Quiz Results |           |                 | Do you know what         | Did you already       |
|---------------|--------------|--------|------------|--------------|-----------|-----------------|--------------------------|-----------------------|
|               | Score        | Points | Percentile | Correct      | Incorrect | Total_Questions | is ultra-processed food? | know this definition? |
|               | 50%          | 5/10   | 27%        | 5            | 5         | 10              | Yes                      | No                    |
|               | 50%          | 5/10   | 27%        | 5            | 5         | 10              | Yes                      | No                    |
|               | 60%          | 6/10   | 46%        | 6            | 4         | 10              | Yes                      | No                    |
|               | 80%          | 8/10   | 88%        | 8            | 2         | 10              | No                       | No                    |
|               | 40%          | 4/10   | 12%        | 4            | 6         | 10              | Yes                      | No                    |
|               | 40%          | 4/10   | 12%        | 4            | 6         | 10              | Yes                      | No                    |
|               | 80%          | 8/10   | 88%        | 8            | 2         | 10              | Yes                      | No                    |
|               | 60%          | 6/10   | 46%        | 6            | 4         | 10              | Yes                      | No                    |
|               | 70%          | 7/10   | 68%        | 7            | 3         | 10              | Yes                      | No                    |
|               | 70%          | 7/10   | 68%        | 7            | 3         | 10              | Yes                      | Yes                   |
|               | 50%          | 5/10   | 27%        | 5            | 5         | 10              | No                       | No                    |
|               | 80%          | 8/10   | 88%        | 8            | 2         | 10              | No                       | No                    |
|               | 60%          | 6/10   | 46%        | 6            | 4         | 10              | Yes                      | No                    |
|               | 70%          | 7/10   | 68%        | 7            | 3         | 10              | Yes                      | No                    |
|               | 80%          | 8/10   | 88%        | 8            | 2         | 10              | Yes                      | No                    |
|               | 100%         | 10/10  | 100%       | 10           | 0         | 10              | Yes                      | Yes                   |
|               | 70%          | 7/10   | 68%        | 7            | 3         | 10              | Yes                      | No                    |
|               | 70%          | 7/10   | 68%        | 7            | 3         | 10              | Yes                      | Yes                   |
|               | 50%          | 5/10   | 27%        | 5            | 5         | 10              | Yes                      | No                    |
|               | 70%          | 7/10   | 68%        | 7            | 3         | 10              | Yes                      | No                    |
|               | 90%          | 9/10   | 99%        | 9            | 1         | 10              | Yes                      | No                    |
|               | 70%          | 7/10   | 68%        | 7            | 3         | 10              | Yes                      | No                    |
|               | 40%          | 4/10   | 12%        | 4            | 6         | 10              | Yes                      | No                    |
|               | 80%          | 8/10   | 88%        | 8            | 2         | 10              | Yes                      | No                    |
|               | 70%          | 7/10   | 68%        | 7            | 3         | 10              | Yes                      | Yes                   |
|               | 40%          | 4/10   | 12%        | 4            | 6         | 10              | No                       | No                    |
|               | 70%          | 7/10   | 68%        | 7            | 3         | 10              | Yes                      | Yes                   |
|               | 60%          | 6/10   | 46%        | 6            | 4         | 10              | Yes                      | No                    |
|               | 70%          | 7/10   | 68%        | 7            | 3         | 10              | Yes                      | No                    |
|               | 70%          | 7/10   | 68%        | 7            | 3         | 10              | Yes                      | No                    |
|               | 60%          | 6/10   | 46%        | 6            | 4         | 10              | Yes                      | No                    |
|               | 50%          | 5/10   | 27%        | 5            | 5         | 10              | Yes                      | Yes                   |
|               | 50%          | 5/10   | 27%        | 5            | 5         | 10              | Yes                      | No                    |
|               | 50%          | 5/10   | 27%        | 5            | 5         | 10              | Yes                      | No                    |
|               | 90%          | 9/10   | 99%        | 9            | 1         | 10              | Yes                      | Yes                   |
|               | 70%          | 7/10   | 68%        | 7            | 3         | 10              | Yes                      | No                    |
|               | 50%          | 5/10   | 27%        | 5            | 5         | 10              | Yes                      | No                    |
|               | 60%          | 6/10   | 46%        | 6            | 4         | 10              | Yes                      | No                    |
|               | 80%          | 8/10   | 88%        | 8            | 2         | 10              | Yes                      | Yes                   |
|               | 60%          | 6/10   | 46%        | 6            | 4         | 10              | No                       | No                    |
|               | 60%          | 6/10   | 46%        | 6            | 4         | 10              | Yes                      | Yes                   |
|               | 90%          | 9/10   | 99%        | 9            | 1         | 10              | Yes                      | No                    |
|               | 50%          | 5/10   | 27%        | 5            | 5         | 10              | Yes                      | No                    |
|               | 50%          | 5/10   | 27%        | 5            | 5         | 10              | No                       | No                    |
|               | 80%          | 8/10   | 88%        | 8            | 2         | 10              | Yes                      | No                    |

Table S1 Quiz Summary

| Respondent ID | Quiz Summary |        |            | Quiz Results |           |                 | Do you know what         | Did you already       |
|---------------|--------------|--------|------------|--------------|-----------|-----------------|--------------------------|-----------------------|
|               | Score        | Points | Percentile | Correct      | Incorrect | Total_Questions | is ultra-processed food? | know this definition? |
|               | 70%          | 7/10   | 68%        | 7            | 3         | 10              | No                       | No                    |
|               | 80%          | 8/10   | 88%        | 8            | 2         | 10              | Yes                      | No                    |
|               | 40%          | 4/10   | 12%        | 4            | 6         | 10              | No                       | No                    |
|               | 60%          | 6/10   | 46%        | 6            | 4         | 10              | Yes                      | No                    |
|               | 60%          | 6/10   | 46%        | 6            | 4         | 10              | Yes                      | Yes                   |
|               | 70%          | 7/10   | 68%        | 7            | 3         | 10              | Yes                      | No                    |
|               | 50%          | 5/10   | 27%        | 5            | 5         | 10              | Yes                      | Yes                   |
|               | 40%          | 4/10   | 12%        | 4            | 6         | 10              | Yes                      | No                    |
|               | 80%          | 8/10   | 88%        | 8            | 2         | 10              | Yes                      | No                    |
|               | 50%          | 5/10   | 27%        | 5            | 5         | 10              | Yes                      | No                    |
|               | 50%          | 5/10   | 27%        | 5            | 5         | 10              | Yes                      | No                    |
|               | 50%          | 5/10   | 27%        | 5            | 5         | 10              | Yes                      | No                    |
|               | 50%          | 5/10   | 27%        | 5            | 5         | 10              | Yes                      | No                    |
|               | 70%          | 7/10   | 68%        | 7            | 3         | 10              | No                       | No                    |
|               | 40%          | 4/10   | 12%        | 4            | 6         | 10              | Yes                      | Yes                   |
|               | 60%          | 6/10   | 46%        | 6            | 4         | 10              | No                       | No                    |
|               | 60%          | 6/10   | 46%        | 6            | 4         | 10              | Yes                      | Yes                   |
|               | 90%          | 9/10   | 99%        | 9            | 1         | 10              | Yes                      | Yes                   |
|               | 60%          | 6/10   | 46%        | 6            | 4         | 10              | Yes                      | Yes                   |
|               | 60%          | 6/10   | 46%        | 6            | 4         | 10              | Yes                      | No                    |
|               | 80%          | 8/10   | 88%        | 8            | 2         | 10              | Yes                      | No                    |
|               | 80%          | 8/10   | 88%        | 8            | 2         | 10              | Yes                      | No                    |
|               | 60%          | 6/10   | 46%        | 6            | 4         | 10              | Yes                      | No                    |
|               | 80%          | 8/10   | 88%        | 8            | 2         | 10              | Yes                      | Yes                   |
|               | 60%          | 6/10   | 46%        | 6            | 4         | 10              | Yes                      | Yes                   |
|               | 90%          | 9/10   | 99%        | 9            | 1         | 10              | Yes                      | No                    |
|               | 80%          | 8/10   | 88%        | 8            | 2         | 10              | Yes                      | No                    |
|               | 80%          | 8/10   | 88%        | 8            | 2         | 10              | Yes                      | No                    |
|               | 60%          | 6/10   | 46%        | 6            | 4         | 10              | Yes                      | No                    |
|               | 90%          | 9/10   | 99%        | 9            | 1         | 10              | Yes                      | No                    |
|               | 80%          | 8/10   | 88%        | 8            | 2         | 10              | No                       | No                    |
|               | 80%          | 8/10   | 88%        | 8            | 2         | 10              | Yes                      | No                    |
|               | 80%          | 8/10   | 88%        | 8            | 2         | 10              | Yes                      | Yes                   |
|               | 50%          | 5/10   | 27%        | 5            | 5         | 10              | Yes                      | No                    |
|               | 70%          | 7/10   | 68%        | 7            | 3         | 10              | Yes                      | Yes                   |
|               | 70%          | 7/10   | 68%        | 7            | 3         | 10              | Yes                      | Yes                   |
|               | 70%          | 7/10   | 68%        | 7            | 3         | 10              | Yes                      | No                    |
|               | 70%          | 7/10   | 68%        | 7            | 3         | 10              | Yes                      | No                    |
|               | 80%          | 8/10   | 88%        | 8            | 2         | 10              | Yes                      | Yes                   |
|               | 80%          | 8/10   | 88%        | 8            | 2         | 10              | Yes                      | Yes                   |
|               | 30%          | 3/10   | 4%         | 3            | 7         | 10              | Yes                      | No                    |
|               | 40%          | 4/10   | 12%        | 4            | 6         | 10              | No                       | No                    |
|               | 40%          | 4/10   | 12%        | 4            | 6         | 10              | Yes                      | Yes                   |
|               | 80%          | 8/10   | 88%        | 8            | 2         | 10              | Yes                      | Yes                   |
|               | 60%          | 6/10   | 46%        | 6            | 4         | 10              | Yes                      | Yes                   |

Table S1 Quiz Summary

| Respondent ID | Quiz Summary |        |            | Quiz Results |           |                 | Do you know what         | Did you already       |
|---------------|--------------|--------|------------|--------------|-----------|-----------------|--------------------------|-----------------------|
|               | Score        | Points | Percentile | Correct      | Incorrect | Total_Questions | is ultra-processed food? | know this definition? |
|               | 50%          | 5/10   | 27%        | 5            | 5         | 10              | No                       | No                    |
|               | 50%          | 5/10   | 27%        | 5            | 5         | 10              | Yes                      | Yes                   |
|               | 40%          | 4/10   | 12%        | 4            | 6         | 10              | No                       | No                    |
|               | 70%          | 7/10   | 68%        | 7            | 3         | 10              | Yes                      | No                    |
|               | 40%          | 4/10   | 12%        | 4            | 6         | 10              | Yes                      | No                    |
|               | 80%          | 8/10   | 88%        | 8            | 2         | 10              | Yes                      | No                    |
|               | 80%          | 8/10   | 88%        | 8            | 2         | 10              | No                       | No                    |
|               | 80%          | 8/10   | 88%        | 8            | 2         | 10              | Yes                      | Yes                   |
|               | 70%          | 7/10   | 68%        | 7            | 3         | 10              | Yes                      | Yes                   |
|               | 50%          | 5/10   | 27%        | 5            | 5         | 10              | Yes                      | Yes                   |
|               | 70%          | 7/10   | 68%        | 7            | 3         | 10              | Yes                      | Yes                   |
|               | 90%          | 9/10   | 99%        | 9            | 1         | 10              | Yes                      | No                    |
|               | 60%          | 6/10   | 46%        | 6            | 4         | 10              | Yes                      | No                    |
|               | 50%          | 5/10   | 27%        | 5            | 5         | 10              | Yes                      | No                    |
|               | 40%          | 4/10   | 12%        | 4            | 6         | 10              | Yes                      | No                    |
|               | 70%          | 7/10   | 68%        | 7            | 3         | 10              | Yes                      | No                    |
|               | 60%          | 6/10   | 46%        | 6            | 4         | 10              | Yes                      | No                    |
|               | 30%          | 3/10   | 4%         | 3            | 7         | 10              | Yes                      | Yes                   |
|               | 30%          | 3/10   | 4%         | 3            | 7         | 10              | Yes                      | Yes                   |
|               | 70%          | 7/10   | 68%        | 7            | 3         | 10              | Yes                      | No                    |
|               | 70%          | 7/10   | 68%        | 7            | 3         | 10              | Yes                      | No                    |
|               | 70%          | 7/10   | 68%        | 7            | 3         | 10              | No                       | No                    |
|               | 60%          | 6/10   | 46%        | 6            | 4         | 10              | Yes                      | No                    |
|               | 80%          | 8/10   | 88%        | 8            | 2         | 10              | Yes                      | Yes                   |
|               | 80%          | 8/10   | 88%        | 8            | 2         | 10              | Yes                      | Yes                   |
|               | 70%          | 7/10   | 68%        | 7            | 3         | 10              | Yes                      | Yes                   |
|               | 40%          | 4/10   | 12%        | 4            | 6         | 10              | Yes                      | Yes                   |
|               | 60%          | 6/10   | 46%        | 6            | 4         | 10              | Yes                      | No                    |
|               | 70%          | 7/10   | 68%        | 7            | 3         | 10              | Yes                      | Yes                   |
|               | 70%          | 7/10   | 68%        | 7            | 3         | 10              | Yes                      | No                    |
|               | 100%         | 10/10  | 100%       | 10           | 0         | 10              | Yes                      | Yes                   |
|               | 70%          | 7/10   | 68%        | 7            | 3         | 10              | Yes                      | No                    |
|               | 80%          | 8/10   | 88%        | 8            | 2         | 10              | Yes                      | Yes                   |
|               | 60%          | 6/10   | 46%        | 6            | 4         | 10              | Yes                      | No                    |
|               | 80%          | 8/10   | 88%        | 8            | 2         | 10              | Yes                      | Yes                   |
|               | 70%          | 7/10   | 68%        | 7            | 3         | 10              | Yes                      | No                    |
|               | 90%          | 9/10   | 99%        | 9            | 1         | 10              | Yes                      | Yes                   |
|               | 90%          | 9/10   | 99%        | 9            | 1         | 10              | Yes                      | Yes                   |
|               | 90%          | 9/10   | 99%        | 9            | 1         | 10              | Yes                      | Yes                   |
|               | 80%          | 8/10   | 88%        | 8            | 2         | 10              | Yes                      | No                    |
|               | 80%          | 8/10   | 88%        | 8            | 2         | 10              | Yes                      | Yes                   |
|               | 80%          | 8/10   | 88%        | 8            | 2         | 10              | Yes                      | Yes                   |
|               | 80%          | 8/10   | 88%        | 8            | 2         | 10              | Yes                      | Yes                   |
|               | 50%          | 5/10   | 27%        | 5            | 5         | 10              | Yes                      | Yes                   |
|               | 50%          | 5/10   | 27%        | 5            | 5         | 10              | Yes                      | No                    |

Table S1 Quiz Summary

| Respondent ID | Quiz Summary |        |            | Quiz Results |           |                 | Do you know what         | Did you already       |
|---------------|--------------|--------|------------|--------------|-----------|-----------------|--------------------------|-----------------------|
|               | Score        | Points | Percentile | Correct      | Incorrect | Total_Questions | is ultra-processed food? | know this definition? |
|               | 70%          | 7/10   | 68%        | 7            | 3         | 10              | Yes                      | Yes                   |
|               | 80%          | 8/10   | 88%        | 8            | 2         | 10              | Yes                      | Yes                   |
|               | 90%          | 9/10   | 99%        | 9            | 1         | 10              | Yes                      | Yes                   |
|               | 90%          | 9/10   | 99%        | 9            | 1         | 10              | Yes                      | Yes                   |
|               | 70%          | 7/10   | 68%        | 7            | 3         | 10              | Yes                      | Yes                   |
|               | 80%          | 8/10   | 88%        | 8            | 2         | 10              | Yes                      | Yes                   |
|               | 70%          | 7/10   | 68%        | 7            | 3         | 10              | Yes                      | No                    |
|               | 50%          | 5/10   | 27%        | 5            | 5         | 10              | Yes                      | No                    |
|               | 80%          | 8/10   | 88%        | 8            | 2         | 10              | Yes                      | Yes                   |
|               | 70%          | 7/10   | 68%        | 7            | 3         | 10              | Yes                      | Yes                   |
|               | 80%          | 8/10   | 88%        | 8            | 2         | 10              | Yes                      | Yes                   |
|               | 90%          | 9/10   | 99%        | 9            | 1         | 10              | Yes                      | Yes                   |
|               | 80%          | 8/10   | 88%        | 8            | 2         | 10              | No                       | No                    |
|               | 80%          | 8/10   | 88%        | 8            | 2         | 10              | Yes                      | No                    |
|               | 70%          | 7/10   | 68%        | 7            | 3         | 10              | Yes                      | No                    |
|               | 80%          | 8/10   | 88%        | 8            | 2         | 10              | Yes                      | No                    |
|               | 80%          | 8/10   | 88%        | 8            | 2         | 10              | Yes                      | No                    |
|               | 70%          | 7/10   | 68%        | 7            | 3         | 10              | No                       | No                    |
|               | 50%          | 5/10   | 27%        | 5            | 5         | 10              | Yes                      | No                    |
|               | 60%          | 6/10   | 46%        | 6            | 4         | 10              | Yes                      | No                    |
|               | 80%          | 8/10   | 88%        | 8            | 2         | 10              | No                       | No                    |
|               | 60%          | 6/10   | 46%        | 6            | 4         | 10              | Yes                      | Yes                   |
|               | 60%          | 6/10   | 46%        | 6            | 4         | 10              | Yes                      | No                    |
|               | 50%          | 5/10   | 27%        | 5            | 5         | 10              | Yes                      | Yes                   |
|               | 70%          | 7/10   | 68%        | 7            | 3         | 10              | Yes                      | No                    |
|               | 70%          | 7/10   | 68%        | 7            | 3         | 10              | Yes                      | No                    |
|               | 60%          | 6/10   | 46%        | 6            | 4         | 10              | No                       | No                    |
|               | 80%          | 8/10   | 88%        | 8            | 2         | 10              | Yes                      | No                    |
|               | 70%          | 7/10   | 68%        | 7            | 3         | 10              | Yes                      | No                    |
|               | 80%          | 8/10   | 88%        | 8            | 2         | 10              | Yes                      | No                    |
|               | 70%          | 7/10   | 68%        | 7            | 3         | 10              | Yes                      | No                    |
|               | 70%          | 7/10   | 68%        | 7            | 3         | 10              | Yes                      | No                    |
|               | 90%          | 9/10   | 99%        | 9            | 1         | 10              | Yes                      | No                    |
|               | 50%          | 5/10   | 27%        | 5            | 5         | 10              | Yes                      | No                    |
|               | 60%          | 6/10   | 46%        | 6            | 4         | 10              | No                       | No                    |
|               | 70%          | 7/10   | 68%        | 7            | 3         | 10              | Yes                      | Yes                   |
|               | 80%          | 8/10   | 88%        | 8            | 2         | 10              | No                       | No                    |
|               | 60%          | 6/10   | 46%        | 6            | 4         | 10              | Yes                      | No                    |
|               | 60%          | 6/10   | 46%        | 6            | 4         | 10              | Yes                      | Yes                   |
|               | 70%          | 7/10   | 68%        | 7            | 3         | 10              | Yes                      | No                    |
|               | 20%          | 2/10   | 1%         | 2            | 8         | 10              | Yes                      | No                    |
|               | 70%          | 7/10   | 68%        | 7            | 3         | 10              | Yes                      | Yes                   |
|               | 70%          | 7/10   | 68%        | 7            | 3         | 10              | Yes                      | Yes                   |
|               | 80%          | 8/10   | 88%        | 8            | 2         | 10              | Yes                      | No                    |
|               | 80%          | 8/10   | 88%        | 8            | 2         | 10              | Yes                      | Yes                   |



Table S1 Quiz Summary

| Respondent ID | Quiz Summary |        |            | Quiz Results |           |                 | Do you know what         | Did you already       |
|---------------|--------------|--------|------------|--------------|-----------|-----------------|--------------------------|-----------------------|
|               | Score        | Points | Percentile | Correct      | Incorrect | Total_Questions | is ultra-processed food? | know this definition? |
|               | 60%          | 6/10   | 46%        | 6            | 4         | 10              | Yes                      | No                    |
|               | 80%          | 8/10   | 88%        | 8            | 2         | 10              | Yes                      | Yes                   |
|               | 50%          | 5/10   | 27%        | 5            | 5         | 10              | Yes                      | No                    |
|               | 70%          | 7/10   | 68%        | 7            | 3         | 10              | No                       | No                    |
|               | 20%          | 2/10   | 1%         | 2            | 8         | 10              | Yes                      | Yes                   |
|               | 40%          | 4/10   | 12%        | 4            | 6         | 10              | Yes                      | No                    |
|               | 70%          | 7/10   | 68%        | 7            | 3         | 10              | Yes                      | Yes                   |
|               | 50%          | 5/10   | 27%        | 5            | 5         | 10              | Yes                      | Yes                   |
|               | 70%          | 7/10   | 68%        | 7            | 3         | 10              | Yes                      | No                    |
|               | 30%          | 3/10   | 4%         | 3            | 7         | 10              | Yes                      | Yes                   |
|               | 70%          | 7/10   | 68%        | 7            | 3         | 10              | Yes                      | Yes                   |
|               | 70%          | 7/10   | 68%        | 7            | 3         | 10              | Yes                      | Yes                   |
|               | 80%          | 8/10   | 88%        | 8            | 2         | 10              | Yes                      | Yes                   |
|               | 80%          | 8/10   | 88%        | 8            | 2         | 10              | Yes                      | No                    |
|               | 50%          | 5/10   | 27%        | 5            | 5         | 10              | Yes                      | Yes                   |
|               | 40%          | 4/10   | 12%        | 4            | 6         | 10              | Yes                      | No                    |
|               | 70%          | 7/10   | 68%        | 7            | 3         | 10              | Yes                      | No                    |
|               | 60%          | 6/10   | 46%        | 6            | 4         | 10              | Yes                      | Yes                   |
|               | 70%          | 7/10   | 68%        | 7            | 3         | 10              | Yes                      | No                    |
|               | 90%          | 9/10   | 99%        | 9            | 1         | 10              | Yes                      | Yes                   |
|               | 80%          | 8/10   | 88%        | 8            | 2         | 10              | Yes                      | No                    |
|               | 100%         | 10/10  | 100%       | 10           | 0         | 10              | No                       | No                    |
|               | 70%          | 7/10   | 68%        | 7            | 3         | 10              | No                       | No                    |
|               | 50%          | 5/10   | 27%        | 5            | 5         | 10              | Yes                      | Yes                   |
|               | 30%          | 3/10   | 4%         | 3            | 7         | 10              | Yes                      | No                    |
|               | 60%          | 6/10   | 46%        | 6            | 4         | 10              | Yes                      | No                    |
|               | 40%          | 4/10   | 12%        | 4            | 6         | 10              | No                       | No                    |
|               | 50%          | 5/10   | 27%        | 5            | 5         | 10              | Yes                      | Yes                   |
|               | 50%          | 5/10   | 27%        | 5            | 5         | 10              | No                       | No                    |
|               | 60%          | 6/10   | 46%        | 6            | 4         | 10              | Yes                      | No                    |
|               | 60%          | 6/10   | 46%        | 6            | 4         | 10              | Yes                      | No                    |
|               | 80%          | 8/10   | 88%        | 8            | 2         | 10              | Yes                      | Yes                   |
|               | 40%          | 4/10   | 12%        | 4            | 6         | 10              | Yes                      | No                    |
|               | 90%          | 9/10   | 99%        | 9            | 1         | 10              | Yes                      | No                    |
|               | 80%          | 8/10   | 88%        | 8            | 2         | 10              | Yes                      | No                    |
|               | 90%          | 9/10   | 99%        | 9            | 1         | 10              | Yes                      | Yes                   |
|               | 90%          | 9/10   | 99%        | 9            | 1         | 10              | Yes                      | Yes                   |
|               | 30%          | 3/10   | 4%         | 3            | 7         | 10              | Yes                      | No                    |
|               | 70%          | 7/10   | 68%        | 7            | 3         | 10              | Yes                      | No                    |
|               | 60%          | 6/10   | 46%        | 6            | 4         | 10              | No                       | No                    |
|               | 90%          | 9/10   | 99%        | 9            | 1         | 10              | Yes                      | Yes                   |
|               | 90%          | 9/10   | 99%        | 9            | 1         | 10              | Yes                      | No                    |
|               | 50%          | 5/10   | 27%        | 5            | 5         | 10              | Yes                      | Yes                   |
|               | 70%          | 7/10   | 68%        | 7            | 3         | 10              | No                       | No                    |
|               | 50%          | 5/10   | 27%        | 5            | 5         | 10              | Yes                      | No                    |

Table S1 Quiz Summary

| Respondent ID | Quiz Summary |        |            | Quiz Results |           |                 | Do you know what         | Did you already       |
|---------------|--------------|--------|------------|--------------|-----------|-----------------|--------------------------|-----------------------|
|               | Score        | Points | Percentile | Correct      | Incorrect | Total_Questions | is ultra-processed food? | know this definition? |
|               | 50%          | 5/10   | 27%        | 5            | 5         | 10              | No                       | No                    |
|               | 60%          | 6/10   | 46%        | 6            | 4         | 10              | Yes                      | Yes                   |
|               | 60%          | 6/10   | 46%        | 6            | 4         | 10              | Yes                      | No                    |
|               | 80%          | 8/10   | 88%        | 8            | 2         | 10              | Yes                      | Yes                   |
|               | 70%          | 7/10   | 68%        | 7            | 3         | 10              | No                       | No                    |
|               | 70%          | 7/10   | 68%        | 7            | 3         | 10              | Yes                      | Yes                   |
|               | 60%          | 6/10   | 46%        | 6            | 4         | 10              | Yes                      | No                    |
|               | 40%          | 4/10   | 12%        | 4            | 6         | 10              | Yes                      | No                    |
|               | 50%          | 5/10   | 27%        | 5            | 5         | 10              | Yes                      | No                    |
|               | 80%          | 8/10   | 88%        | 8            | 2         | 10              | Yes                      | No                    |
|               | 60%          | 6/10   | 46%        | 6            | 4         | 10              | Yes                      | No                    |
|               | 50%          | 5/10   | 27%        | 5            | 5         | 10              | Yes                      | No                    |
|               | 60%          | 6/10   | 46%        | 6            | 4         | 10              | No                       | No                    |
|               | 50%          | 5/10   | 27%        | 5            | 5         | 10              | Yes                      | Yes                   |
|               | 60%          | 6/10   | 46%        | 6            | 4         | 10              | Yes                      | No                    |
|               | 50%          | 5/10   | 27%        | 5            | 5         | 10              | Yes                      | Yes                   |
|               | 50%          | 5/10   | 27%        | 5            | 5         | 10              | Yes                      | Yes                   |
|               | 90%          | 9/10   | 99%        | 9            | 1         | 10              | Yes                      | Yes                   |
|               | 60%          | 6/10   | 46%        | 6            | 4         | 10              | Yes                      | No                    |
|               | 80%          | 8/10   | 88%        | 8            | 2         | 10              | Yes                      | No                    |
|               | 80%          | 8/10   | 88%        | 8            | 2         | 10              | Yes                      | No                    |
|               | 30%          | 3/10   | 4%         | 3            | 7         | 10              | Yes                      | Yes                   |
|               | 80%          | 8/10   | 88%        | 8            | 2         | 10              | Yes                      | Yes                   |
|               | 40%          | 4/10   | 12%        | 4            | 6         | 10              | Yes                      | Yes                   |
|               | 40%          | 4/10   | 12%        | 4            | 6         | 10              | Yes                      | Yes                   |
|               | 70%          | 7/10   | 68%        | 7            | 3         | 10              | Yes                      | Yes                   |
|               | 80%          | 8/10   | 88%        | 8            | 2         | 10              | Yes                      | Yes                   |
|               | 60%          | 6/10   | 46%        | 6            | 4         | 10              | Yes                      | Yes                   |
|               | 70%          | 7/10   | 68%        | 7            | 3         | 10              | Yes                      | No                    |
|               | 70%          | 7/10   | 68%        | 7            | 3         | 10              | Yes                      | Yes                   |
|               | 50%          | 5/10   | 27%        | 5            | 5         | 10              | Yes                      | Yes                   |
|               | 70%          | 7/10   | 68%        | 7            | 3         | 10              | No                       | No                    |
|               | 70%          | 7/10   | 68%        | 7            | 3         | 10              | Yes                      | Yes                   |
|               | 70%          | 7/10   | 68%        | 7            | 3         | 10              | Yes                      | No                    |
|               | 90%          | 9/10   | 99%        | 9            | 1         | 10              | No                       | No                    |
|               | 60%          | 6/10   | 46%        | 6            | 4         | 10              | Yes                      | No                    |
|               | 60%          | 6/10   | 46%        | 6            | 4         | 10              | Yes                      | No                    |
|               | 70%          | 7/10   | 68%        | 7            | 3         | 10              | No                       | No                    |
|               | 90%          | 9/10   | 99%        | 9            | 1         | 10              | Yes                      | No                    |
|               | 80%          | 8/10   | 88%        | 8            | 2         | 10              | No                       | No                    |
|               | 60%          | 6/10   | 46%        | 6            | 4         | 10              | Yes                      | No                    |
|               | 60%          | 6/10   | 46%        | 6            | 4         | 10              | Yes                      | Yes                   |
|               | 40%          | 4/10   | 12%        | 4            | 6         | 10              | Yes                      | Yes                   |
|               | 80%          | 8/10   | 88%        | 8            | 2         | 10              | Yes                      | No                    |
|               | 40%          | 4/10   | 12%        | 4            | 6         | 10              | No                       | No                    |

Table S1 Quiz Summary

| Respondent ID | Quiz Summary |        |            | Quiz Results |           |                 | Do you know what         | Did you already       |
|---------------|--------------|--------|------------|--------------|-----------|-----------------|--------------------------|-----------------------|
|               | Score        | Points | Percentile | Correct      | Incorrect | Total_Questions | is ultra-processed food? | know this definition? |
|               | 40%          | 4/10   | 12%        | 4            | 6         | 10              | Yes                      | No                    |
|               | 30%          | 3/10   | 4%         | 3            | 7         | 10              | Yes                      | Yes                   |
|               | 50%          | 5/10   | 27%        | 5            | 5         | 10              | Yes                      | Yes                   |
|               | 60%          | 6/10   | 46%        | 6            | 4         | 10              | Yes                      | No                    |
|               | 70%          | 7/10   | 68%        | 7            | 3         | 10              | Yes                      | Yes                   |
|               | 80%          | 8/10   | 88%        | 8            | 2         | 10              | Yes                      | Yes                   |
|               | 80%          | 8/10   | 88%        | 8            | 2         | 10              | Yes                      | Yes                   |
|               | 70%          | 7/10   | 68%        | 7            | 3         | 10              | Yes                      | Yes                   |
|               | 60%          | 6/10   | 46%        | 6            | 4         | 10              | Yes                      | No                    |
|               | 80%          | 8/10   | 88%        | 8            | 2         | 10              | No                       | No                    |
|               | 30%          | 3/10   | 4%         | 3            | 7         | 10              | Yes                      | Yes                   |
|               | 70%          | 7/10   | 68%        | 7            | 3         | 10              | Yes                      | Yes                   |
|               | 80%          | 8/10   | 88%        | 8            | 2         | 10              | Yes                      | Yes                   |
|               | 60%          | 6/10   | 46%        | 6            | 4         | 10              | No                       | No                    |
|               | 80%          | 8/10   | 88%        | 8            | 2         | 10              | Yes                      | Yes                   |
|               | 70%          | 7/10   | 68%        | 7            | 3         | 10              | Yes                      | No                    |
|               | 90%          | 9/10   | 99%        | 9            | 1         | 10              | Yes                      | Yes                   |
|               | 60%          | 6/10   | 46%        | 6            | 4         | 10              | Yes                      | Yes                   |
|               | 40%          | 4/10   | 12%        | 4            | 6         | 10              | No                       | No                    |
|               | 50%          | 5/10   | 27%        | 5            | 5         | 10              | Yes                      | Yes                   |
|               | 70%          | 7/10   | 68%        | 7            | 3         | 10              | No                       | No                    |
|               | 70%          | 7/10   | 68%        | 7            | 3         | 10              | Yes                      | No                    |
|               | 60%          | 6/10   | 46%        | 6            | 4         | 10              | No                       | No                    |
|               | 60%          | 6/10   | 46%        | 6            | 4         | 10              | No                       | No                    |
|               | 40%          | 4/10   | 12%        | 4            | 6         | 10              | Yes                      | Yes                   |
|               | 70%          | 7/10   | 68%        | 7            | 3         | 10              | Yes                      | Yes                   |
|               | 70%          | 7/10   | 68%        | 7            | 3         | 10              | Yes                      | Yes                   |
|               | 60%          | 6/10   | 46%        | 6            | 4         | 10              | Yes                      | Yes                   |
|               | 80%          | 8/10   | 88%        | 8            | 2         | 10              | No                       | No                    |
|               | 50%          | 5/10   | 27%        | 5            | 5         | 10              | No                       | No                    |
|               | 60%          | 6/10   | 46%        | 6            | 4         | 10              | Yes                      | No                    |
|               | 60%          | 6/10   | 46%        | 6            | 4         | 10              | Yes                      | Yes                   |
|               | 60%          | 6/10   | 46%        | 6            | 4         | 10              | Yes                      | No                    |
|               | 60%          | 6/10   | 46%        | 6            | 4         | 10              | Yes                      | No                    |
|               | 40%          | 4/10   | 12%        | 4            | 6         | 10              | No                       | No                    |
|               | 70%          | 7/10   | 68%        | 7            | 3         | 10              | Yes                      | No                    |
|               | 70%          | 7/10   | 68%        | 7            | 3         | 10              | Yes                      | Yes                   |
|               | 70%          | 7/10   | 68%        | 7            | 3         | 10              | Yes                      | No                    |
|               | 20%          | 2/10   | 1%         | 2            | 8         | 10              | Yes                      | Yes                   |
|               | 70%          | 7/10   | 68%        | 7            | 3         | 10              | No                       | No                    |
|               | 30%          | 3/10   | 4%         | 3            | 7         | 10              | Yes                      | No                    |
|               | 30%          | 3/10   | 4%         | 3            | 7         | 10              | Yes                      | No                    |
|               | 30%          | 3/10   | 4%         | 3            | 7         | 10              | Yes                      | Yes                   |
|               | 60%          | 6/10   | 46%        | 6            | 4         | 10              | Yes                      | No                    |
|               | 50%          | 5/10   | 27%        | 5            | 5         | 10              | No                       | No                    |

Table S1 Quiz Summary

| Respondent ID | Quiz Summary |        |            | Quiz Results |           |                 | Do you know what         | Did you already       |
|---------------|--------------|--------|------------|--------------|-----------|-----------------|--------------------------|-----------------------|
|               | Score        | Points | Percentile | Correct      | Incorrect | Total_Questions | is ultra-processed food? | know this definition? |
|               | 30%          | 3/10   | 4%         | 3            | 7         | 10              | Yes                      | Yes                   |
|               | 80%          | 8/10   | 88%        | 8            | 2         | 10              | Yes                      | No                    |
|               | 40%          | 4/10   | 12%        | 4            | 6         | 10              | Yes                      | No                    |
|               | 60%          | 6/10   | 46%        | 6            | 4         | 10              | Yes                      | Yes                   |
|               | 40%          | 4/10   | 12%        | 4            | 6         | 10              | Yes                      | No                    |
|               | 90%          | 9/10   | 99%        | 9            | 1         | 10              | Yes                      | No                    |
|               | 40%          | 4/10   | 12%        | 4            | 6         | 10              | No                       | No                    |
|               | 20%          | 2/10   | 1%         | 2            | 8         | 10              | Yes                      | No                    |
|               | 40%          | 4/10   | 12%        | 4            | 6         | 10              | Yes                      | No                    |
|               | 60%          | 6/10   | 46%        | 6            | 4         | 10              | Yes                      | Yes                   |
|               | 70%          | 7/10   | 68%        | 7            | 3         | 10              | Yes                      | Yes                   |
|               | 60%          | 6/10   | 46%        | 6            | 4         | 10              | Yes                      | Yes                   |
|               | 70%          | 7/10   | 68%        | 7            | 3         | 10              | Yes                      | No                    |
|               | 70%          | 7/10   | 68%        | 7            | 3         | 10              | Yes                      | Yes                   |
|               | 50%          | 5/10   | 27%        | 5            | 5         | 10              | No                       | No                    |
|               | 50%          | 5/10   | 27%        | 5            | 5         | 10              | Yes                      | No                    |
|               | 80%          | 8/10   | 88%        | 8            | 2         | 10              | Yes                      | No                    |
|               | 70%          | 7/10   | 68%        | 7            | 3         | 10              | Yes                      | Yes                   |
|               | 70%          | 7/10   | 68%        | 7            | 3         | 10              | Yes                      | No                    |
|               | 80%          | 8/10   | 88%        | 8            | 2         | 10              | Yes                      | No                    |
|               | 60%          | 6/10   | 46%        | 6            | 4         | 10              | Yes                      | No                    |
|               | 70%          | 7/10   | 68%        | 7            | 3         | 10              | Yes                      | No                    |
|               | 50%          | 5/10   | 27%        | 5            | 5         | 10              | No                       | No                    |
|               | 40%          | 4/10   | 12%        | 4            | 6         | 10              | No                       | No                    |
|               | 70%          | 7/10   | 68%        | 7            | 3         | 10              | Yes                      | No                    |
|               | 80%          | 8/10   | 88%        | 8            | 2         | 10              | No                       | No                    |
|               | 70%          | 7/10   | 68%        | 7            | 3         | 10              | Yes                      | No                    |
|               | 80%          | 8/10   | 88%        | 8            | 2         | 10              | Yes                      | Yes                   |
|               | 90%          | 9/10   | 99%        | 9            | 1         | 10              | No                       | No                    |
|               | 80%          | 8/10   | 88%        | 8            | 2         | 10              | Yes                      | No                    |
|               | 80%          | 8/10   | 88%        | 8            | 2         | 10              | Yes                      | No                    |
|               | 70%          | 7/10   | 68%        | 7            | 3         | 10              | Yes                      | No                    |
|               | 90%          | 9/10   | 99%        | 9            | 1         | 10              | Yes                      | No                    |
|               | 80%          | 8/10   | 88%        | 8            | 2         | 10              | Yes                      | No                    |
|               | 80%          | 8/10   | 88%        | 8            | 2         | 10              | Yes                      | No                    |
|               | 70%          | 7/10   | 68%        | 7            | 3         | 10              | Yes                      | No                    |
|               | 90%          | 9/10   | 99%        | 9            | 1         | 10              | Yes                      | Yes                   |
|               | 100%         | 10/10  | 100%       | 10           | 0         | 10              | Yes                      | Yes                   |
|               | 90%          | 9/10   | 99%        | 9            | 1         | 10              | Yes                      | Yes                   |
|               | 90%          | 9/10   | 99%        | 9            | 1         | 10              | Yes                      | Yes                   |
|               | 100%         | 10/10  | 100%       | 10           | 0         | 10              | Yes                      | Yes                   |
|               | 50%          | 5/10   | 27%        | 5            | 5         | 10              | Yes                      | Yes                   |
|               | 50%          | 5/10   | 27%        | 5            | 5         | 10              | Yes                      | No                    |
|               | 90%          | 9/10   | 99%        | 9            | 1         | 10              | Yes                      | Yes                   |
|               | 90%          | 9/10   | 99%        | 9            | 1         | 10              | Yes                      | Yes                   |

Table S1 Quiz Summary

| Respondent ID | Quiz Summary |        |            | Quiz Results |           |                 | Do you know what         | Did you already       |
|---------------|--------------|--------|------------|--------------|-----------|-----------------|--------------------------|-----------------------|
|               | Score        | Points | Percentile | Correct      | Incorrect | Total_Questions | is ultra-processed food? | know this definition? |
|               | 60%          | 6/10   | 46%        | 6            | 4         | 10              | Yes                      | Yes                   |
|               | 100%         | 10/10  | 100%       | 10           | 0         | 10              | Yes                      | Yes                   |
|               | 70%          | 7/10   | 68%        | 7            | 3         | 10              | Yes                      | Yes                   |
|               | 80%          | 8/10   | 88%        | 8            | 2         | 10              | Yes                      | Yes                   |
|               | 50%          | 5/10   | 25%        | 5            | 5         | 10              | Yes                      | No                    |
|               | 60%          | 6/10   | 46%        | 6            | 4         | 10              | Yes                      | Yes                   |
|               | 80%          | 8/10   | 89%        | 8            | 2         | 10              | No                       | No                    |
|               | 70%          | 7/10   | 68%        | 7            | 3         | 10              | Yes                      | No                    |
|               | 80%          | 8/10   | 89%        | 8            | 2         | 10              | No                       | No                    |
|               | 40%          | 4/10   | 10%        | 4            | 6         | 10              | Yes                      | No                    |
|               | 80%          | 8/10   | 89%        | 8            | 2         | 10              | Yes                      | Yes                   |
|               | 70%          | 7/10   | 68%        | 7            | 3         | 10              | Yes                      | Yes                   |
|               | 60%          | 6/10   | 46%        | 6            | 4         | 10              | Yes                      | No                    |
|               | 40%          | 4/10   | 10%        | 4            | 6         | 10              | Yes                      | Yes                   |
|               | 70%          | 7/10   | 68%        | 7            | 3         | 10              | No                       | No                    |
|               | 60%          | 6/10   | 46%        | 6            | 4         | 10              | No                       | No                    |
|               | 60%          | 6/10   | 46%        | 6            | 4         | 10              | Yes                      | No                    |
|               | 40%          | 4/10   | 10%        | 4            | 6         | 10              | Yes                      | No                    |
|               | 70%          | 7/10   | 68%        | 7            | 3         | 10              | Yes                      | No                    |
|               | 100%         | 10/10  | 100%       | 10           | 0         | 10              | Yes                      | Yes                   |
|               | 70%          | 7/10   | 68%        | 7            | 3         | 10              | No                       | No                    |
|               | 60%          | 6/10   | 46%        | 6            | 4         | 10              | Yes                      | No                    |
|               | 50%          | 5/10   | 25%        | 5            | 5         | 10              | Yes                      | No                    |
|               | 70%          | 7/10   | 68%        | 7            | 3         | 10              | Yes                      | Yes                   |
|               | 80%          | 8/10   | 89%        | 8            | 2         | 10              | Yes                      | No                    |
|               | 50%          | 5/10   | 25%        | 5            | 5         | 10              | Yes                      | Yes                   |
|               | 90%          | 9/10   | 99%        | 9            | 1         | 10              | Yes                      | Yes                   |
|               | 60%          | 6/10   | 46%        | 6            | 4         | 10              | No                       | No                    |
|               | 50%          | 5/10   | 25%        | 5            | 5         | 10              | No                       | Yes                   |
|               | 70%          | 7/10   | 68%        | 7            | 3         | 10              | Yes                      | Yes                   |
|               | 30%          | 3/10   | 3%         | 3            | 7         | 10              | No                       | No                    |
|               | 80%          | 8/10   | 89%        | 8            | 2         | 10              | Yes                      | No                    |
|               | 50%          | 5/10   | 25%        | 5            | 5         | 10              | No                       | No                    |
|               | 50%          | 5/10   | 25%        | 5            | 5         | 10              | Yes                      | No                    |
|               | 90%          | 9/10   | 99%        | 9            | 1         | 10              | Yes                      | Yes                   |
|               | 60%          | 6/10   | 46%        | 6            | 4         | 10              | Yes                      | No                    |
|               | 80%          | 8/10   | 89%        | 8            | 2         | 10              | Yes                      | Yes                   |
|               | 50%          | 5/10   | 25%        | 5            | 5         | 10              | Yes                      | No                    |
|               | 80%          | 8/10   | 89%        | 8            | 2         | 10              | Yes                      | No                    |
|               | 40%          | 4/10   | 10%        | 4            | 6         | 10              | No                       | No                    |
|               | 80%          | 8/10   | 89%        | 8            | 2         | 10              | Yes                      | No                    |
|               | 50%          | 5/10   | 25%        | 5            | 5         | 10              | No                       | No                    |
|               | 80%          | 8/10   | 89%        | 8            | 2         | 10              | Yes                      | Yes                   |
|               | 70%          | 7/10   | 68%        | 7            | 3         | 10              | No                       | No                    |
|               | 80%          | 8/10   | 89%        | 8            | 2         | 10              | Yes                      | Yes                   |

Table S1 Quiz Summary

| Respondent ID | Quiz Summary |        |            | Quiz Results |           |                 | Do you know what         | Did you already       |
|---------------|--------------|--------|------------|--------------|-----------|-----------------|--------------------------|-----------------------|
|               | Score        | Points | Percentile | Correct      | Incorrect | Total_Questions | is ultra-processed food? | know this definition? |
|               | 60%          | 6/10   | 46%        | 6            | 4         | 10              | Yes                      | No                    |
|               | 60%          | 6/10   | 46%        | 6            | 4         | 10              | Yes                      | No                    |
|               | 40%          | 4/10   | 10%        | 4            | 6         | 10              | No                       | No                    |
|               | 80%          | 8/10   | 89%        | 8            | 2         | 10              | Yes                      | Yes                   |
|               | 50%          | 5/10   | 25%        | 5            | 5         | 10              | Yes                      | No                    |
|               | 70%          | 7/10   | 68%        | 7            | 3         | 10              | Yes                      | Yes                   |
|               | 80%          | 8/10   | 89%        | 8            | 2         | 10              | Yes                      | No                    |
|               | 60%          | 6/10   | 46%        | 6            | 4         | 10              | Yes                      | No                    |
|               | 80%          | 8/10   | 89%        | 8            | 2         | 10              | Yes                      | Yes                   |
|               | 60%          | 6/10   | 46%        | 6            | 4         | 10              | No                       | No                    |
|               | 60%          | 6/10   | 46%        | 6            | 4         | 10              | No                       | No                    |
|               | 80%          | 8/10   | 89%        | 8            | 2         | 10              | No                       | No                    |
|               | 50%          | 5/10   | 25%        | 5            | 5         | 10              | Yes                      | No                    |
|               | 0%           | 0/10   | 0%         | 0            | 10        | 10              | Yes                      | Yes                   |
|               | 50%          | 5/10   | 25%        | 5            | 5         | 10              | No                       | No                    |
|               | 50%          | 5/10   | 25%        | 5            | 5         | 10              | Yes                      | Yes                   |
|               | 50%          | 5/10   | 25%        | 5            | 5         | 10              | Yes                      | No                    |
|               | 60%          | 6/10   | 46%        | 6            | 4         | 10              | Yes                      | Yes                   |
|               | 60%          | 6/10   | 46%        | 6            | 4         | 10              | Yes                      | No                    |
|               | 60%          | 6/10   | 46%        | 6            | 4         | 10              | No                       | No                    |
|               | 60%          | 6/10   | 46%        | 6            | 4         | 10              | No                       | No                    |
|               | 40%          | 4/10   | 10%        | 4            | 6         | 10              | Yes                      | Yes                   |
|               | 80%          | 8/10   | 89%        | 8            | 2         | 10              | Yes                      | No                    |
|               | 50%          | 5/10   | 25%        | 5            | 5         | 10              | Yes                      | No                    |
|               | 60%          | 6/10   | 46%        | 6            | 4         | 10              | Yes                      | No                    |
|               | 70%          | 7/10   | 68%        | 7            | 3         | 10              | No                       | No                    |
|               | 90%          | 9/10   | 99%        | 9            | 1         | 10              | Yes                      | Yes                   |
|               | 70%          | 7/10   | 68%        | 7            | 3         | 10              | Yes                      | No                    |
|               | 70%          | 7/10   | 68%        | 7            | 3         | 10              | Yes                      | No                    |
|               | 60%          | 6/10   | 46%        | 6            | 4         | 10              | Yes                      | No                    |
|               | 70%          | 7/10   | 68%        | 7            | 3         | 10              | Yes                      | No                    |
|               | 50%          | 5/10   | 25%        | 5            | 5         | 10              | Yes                      | No                    |
|               | 80%          | 8/10   | 89%        | 8            | 2         | 10              | No                       | No                    |
|               | 70%          | 7/10   | 68%        | 7            | 3         | 10              | Yes                      | Yes                   |
|               | 80%          | 8/10   | 89%        | 8            | 2         | 10              | No                       | No                    |
|               | 60%          | 6/10   | 46%        | 6            | 4         | 10              | Yes                      | Yes                   |
|               | 60%          | 6/10   | 46%        | 6            | 4         | 10              | Yes                      | No                    |
|               | 90%          | 9/10   | 99%        | 9            | 1         | 10              | Yes                      | No                    |
|               | 80%          | 8/10   | 89%        | 8            | 2         | 10              | No                       | No                    |
|               | 70%          | 7/10   | 68%        | 7            | 3         | 10              | Yes                      | Yes                   |
|               | 60%          | 6/10   | 46%        | 6            | 4         | 10              | Yes                      | No                    |
|               | 30%          | 3/10   | 3%         | 3            | 7         | 10              | Yes                      | Yes                   |
|               | 30%          | 3/10   | 3%         | 3            | 7         | 10              | Yes                      | Yes                   |
|               | 60%          | 6/10   | 46%        | 6            | 4         | 10              | Yes                      | Yes                   |
|               | 80%          | 8/10   | 89%        | 8            | 2         | 10              | Yes                      | No                    |

Table S1 Quiz Summary

| Respondent ID | Quiz Summary |        |            | Quiz Results |           |                 | Do you know what         | Did you already       |
|---------------|--------------|--------|------------|--------------|-----------|-----------------|--------------------------|-----------------------|
|               | Score        | Points | Percentile | Correct      | Incorrect | Total_Questions | is ultra-processed food? | know this definition? |
|               | 80%          | 8/10   | 89%        | 8            | 2         | 10              | Yes                      | Yes                   |
|               | 60%          | 6/10   | 46%        | 6            | 4         | 10              | Yes                      | No                    |
|               | 80%          | 8/10   | 89%        | 8            | 2         | 10              | Yes                      | Yes                   |
|               | 70%          | 7/10   | 68%        | 7            | 3         | 10              | Yes                      | No                    |
|               | 60%          | 6/10   | 46%        | 6            | 4         | 10              | Yes                      | No                    |
|               | 70%          | 7/10   | 68%        | 7            | 3         | 10              | Yes                      | Yes                   |
|               | 20%          | 2/10   | 1%         | 2            | 8         | 10              | Yes                      | Yes                   |
|               | 80%          | 8/10   | 89%        | 8            | 2         | 10              | Yes                      | No                    |
|               | 50%          | 5/10   | 25%        | 5            | 5         | 10              | Yes                      | No                    |
|               | 90%          | 9/10   | 99%        | 9            | 1         | 10              | No                       | No                    |
|               | 50%          | 5/10   | 25%        | 5            | 5         | 10              | No                       | No                    |
|               | 60%          | 6/10   | 46%        | 6            | 4         | 10              | No                       | No                    |
|               | 80%          | 8/10   | 89%        | 8            | 2         | 10              | Yes                      | No                    |
|               | 70%          | 7/10   | 68%        | 7            | 3         | 10              | Yes                      | No                    |
|               | 90%          | 9/10   | 99%        | 9            | 1         | 10              | Yes                      | Yes                   |
|               | 80%          | 8/10   | 89%        | 8            | 2         | 10              | Yes                      | Yes                   |
|               | 60%          | 6/10   | 46%        | 6            | 4         | 10              | Yes                      | No                    |
|               | 80%          | 8/10   | 89%        | 8            | 2         | 10              | Yes                      | Yes                   |
|               | 50%          | 5/10   | 25%        | 5            | 5         | 10              | No                       | No                    |
|               | 70%          | 7/10   | 68%        | 7            | 3         | 10              | Yes                      | No                    |
|               | 80%          | 8/10   | 89%        | 8            | 2         | 10              | No                       | No                    |
|               | 80%          | 8/10   | 89%        | 8            | 2         | 10              | Yes                      | No                    |
|               | 90%          | 9/10   | 99%        | 9            | 1         | 10              | Yes                      | Yes                   |
|               | 70%          | 7/10   | 68%        | 7            | 3         | 10              | Yes                      | Yes                   |
|               | 80%          | 8/10   | 89%        | 8            | 2         | 10              | Yes                      | No                    |
|               | 70%          | 7/10   | 68%        | 7            | 3         | 10              | Yes                      | Yes                   |
|               | 60%          | 6/10   | 46%        | 6            | 4         | 10              | Yes                      | No                    |
|               | 50%          | 5/10   | 25%        | 5            | 5         | 10              | Yes                      | No                    |
|               | 80%          | 8/10   | 89%        | 8            | 2         | 10              | Yes                      | No                    |
|               | 50%          | 5/10   | 25%        | 5            | 5         | 10              | No                       | No                    |
|               | 60%          | 6/10   | 46%        | 6            | 4         | 10              | Yes                      | No                    |
|               | 60%          | 6/10   | 46%        | 6            | 4         | 10              | No                       | No                    |
|               | 40%          | 4/10   | 10%        | 4            | 6         | 10              | No                       | No                    |
|               | 80%          | 8/10   | 89%        | 8            | 2         | 10              | Yes                      | No                    |
|               | 90%          | 9/10   | 99%        | 9            | 1         | 10              | No                       | No                    |
|               | 40%          | 4/10   | 10%        | 4            | 6         | 10              | No                       | No                    |
|               | 50%          | 5/10   | 25%        | 5            | 5         | 10              | Yes                      | No                    |
|               | 50%          | 5/10   | 25%        | 5            | 5         | 10              | Yes                      | No                    |
|               | 70%          | 7/10   | 68%        | 7            | 3         | 10              | Yes                      | No                    |
|               | 100%         | 10/10  | 100%       | 10           | 0         | 10              | Yes                      | Yes                   |
|               | 80%          | 8/10   | 89%        | 8            | 2         | 10              | Yes                      | No                    |
|               | 80%          | 8/10   | 89%        | 8            | 2         | 10              | Yes                      | No                    |
|               | 50%          | 5/10   | 25%        | 5            | 5         | 10              | Yes                      | No                    |
|               | 40%          | 4/10   | 10%        | 4            | 6         | 10              | No                       | No                    |
|               | 60%          | 6/10   | 46%        | 6            | 4         | 10              | Yes                      | No                    |

Table S1 Quiz Summary

| Respondent ID | Quiz Summary |        |            | Quiz Results |           |                 | Do you know what         | Did you already       |
|---------------|--------------|--------|------------|--------------|-----------|-----------------|--------------------------|-----------------------|
|               | Score        | Points | Percentile | Correct      | Incorrect | Total_Questions | is ultra-processed food? | know this definition? |
|               | 40%          | 4/10   | 10%        | 4            | 6         | 10              | Yes                      | No                    |
|               | 80%          | 8/10   | 89%        | 8            | 2         | 10              | Yes                      | No                    |
|               | 90%          | 9/10   | 99%        | 9            | 1         | 10              | Yes                      | No                    |
|               | 80%          | 8/10   | 89%        | 8            | 2         | 10              | Yes                      | No                    |
|               | 60%          | 6/10   | 46%        | 6            | 4         | 10              | Yes                      | No                    |
|               | 80%          | 8/10   | 89%        | 8            | 2         | 10              | Yes                      | Yes                   |
|               | 60%          | 6/10   | 46%        | 6            | 4         | 10              | Yes                      | No                    |
|               | 60%          | 6/10   | 46%        | 6            | 4         | 10              | Yes                      | No                    |
|               | 80%          | 8/10   | 89%        | 8            | 2         | 10              | Yes                      | No                    |
|               | 70%          | 7/10   | 68%        | 7            | 3         | 10              | Yes                      | No                    |
|               | 50%          | 5/10   | 25%        | 5            | 5         | 10              | Yes                      | No                    |
|               | 90%          | 9/10   | 99%        | 9            | 1         | 10              | No                       | No                    |
|               | 80%          | 8/10   | 89%        | 8            | 2         | 10              | Yes                      | Yes                   |
|               | 80%          | 8/10   | 89%        | 8            | 2         | 10              | Yes                      | No                    |
|               | 80%          | 8/10   | 89%        | 8            | 2         | 10              | No                       | No                    |
|               | 30%          | 3/10   | 3%         | 3            | 7         | 10              | No                       | No                    |
|               | 70%          | 7/10   | 68%        | 7            | 3         | 10              | Yes                      | No                    |
|               | 80%          | 8/10   | 89%        | 8            | 2         | 10              | No                       | No                    |
|               | 40%          | 4/10   | 10%        | 4            | 6         | 10              | Yes                      | No                    |
|               | 70%          | 7/10   | 68%        | 7            | 3         | 10              | Yes                      | Yes                   |
|               | 50%          | 5/10   | 25%        | 5            | 5         | 10              | No                       | No                    |
|               | 70%          | 7/10   | 68%        | 7            | 3         | 10              | Yes                      | No                    |
|               | 80%          | 8/10   | 89%        | 8            | 2         | 10              | No                       | No                    |
|               | 70%          | 7/10   | 68%        | 7            | 3         | 10              | Yes                      | No                    |
|               | 70%          | 7/10   | 68%        | 7            | 3         | 10              | Yes                      | No                    |
|               | 70%          | 7/10   | 68%        | 7            | 3         | 10              | Yes                      | No                    |
|               | 70%          | 7/10   | 68%        | 7            | 3         | 10              | Yes                      | Yes                   |
|               | 60%          | 6/10   | 46%        | 6            | 4         | 10              | Yes                      | No                    |
|               | 60%          | 6/10   | 46%        | 6            | 4         | 10              | Yes                      | No                    |
|               | 80%          | 8/10   | 89%        | 8            | 2         | 10              | Yes                      | No                    |
|               | 90%          | 9/10   | 99%        | 9            | 1         | 10              | Yes                      | No                    |
|               | 70%          | 7/10   | 68%        | 7            | 3         | 10              | Yes                      | No                    |
|               | 70%          | 7/10   | 68%        | 7            | 3         | 10              | No                       | No                    |
|               | 30%          | 3/10   | 3%         | 3            | 7         | 10              | Yes                      | No                    |
|               | 50%          | 5/10   | 25%        | 5            | 5         | 10              | Yes                      | No                    |
|               | 80%          | 8/10   | 89%        | 8            | 2         | 10              | No                       | No                    |
|               | 60%          | 6/10   | 46%        | 6            | 4         | 10              | Yes                      | Yes                   |
|               | 90%          | 9/10   | 99%        | 9            | 1         | 10              | Yes                      | No                    |
|               | 70%          | 7/10   | 68%        | 7            | 3         | 10              | Yes                      | Yes                   |
|               | 100%         | 10/10  | 100%       | 10           | 0         | 10              | Yes                      | No                    |
|               | 50%          | 5/10   | 25%        | 5            | 5         | 10              | Yes                      | No                    |
|               | 50%          | 5/10   | 25%        | 5            | 5         | 10              | Yes                      | No                    |
|               | 80%          | 8/10   | 89%        | 8            | 2         | 10              | Yes                      | No                    |
|               | 50%          | 5/10   | 25%        | 5            | 5         | 10              | Yes                      | No                    |
|               | 50%          | 5/10   | 25%        | 5            | 5         | 10              | No                       | No                    |



Table S1 Quiz Summary

| Respondent ID | Quiz Summary |        |            | Quiz Results |           |                 | Do you know what         | Did you already       |
|---------------|--------------|--------|------------|--------------|-----------|-----------------|--------------------------|-----------------------|
|               | Score        | Points | Percentile | Correct      | Incorrect | Total_Questions | is ultra-processed food? | know this definition? |
|               | 60%          | 6/10   | 46%        | 6            | 4         | 10              | No                       | No                    |
|               | 70%          | 7/10   | 68%        | 7            | 3         | 10              | Yes                      | No                    |
|               | 80%          | 8/10   | 89%        | 8            | 2         | 10              | Yes                      | No                    |
|               | 50%          | 5/10   | 25%        | 5            | 5         | 10              | Yes                      | No                    |
|               | 90%          | 9/10   | 99%        | 9            | 1         | 10              | Yes                      | Yes                   |
|               | 60%          | 6/10   | 46%        | 6            | 4         | 10              | Yes                      | No                    |
|               | 50%          | 5/10   | 25%        | 5            | 5         | 10              | Yes                      | No                    |
|               | 70%          | 7/10   | 68%        | 7            | 3         | 10              | Yes                      | No                    |
|               | 80%          | 8/10   | 89%        | 8            | 2         | 10              | Yes                      | Yes                   |
|               | 70%          | 7/10   | 68%        | 7            | 3         | 10              | Yes                      | Yes                   |
|               | 80%          | 8/10   | 89%        | 8            | 2         | 10              | Yes                      | Yes                   |
|               | 60%          | 6/10   | 46%        | 6            | 4         | 10              | Yes                      | Yes                   |
|               | 80%          | 8/10   | 89%        | 8            | 2         | 10              | Yes                      | No                    |
|               | 80%          | 8/10   | 89%        | 8            | 2         | 10              | Yes                      | Yes                   |
|               | 60%          | 6/10   | 46%        | 6            | 4         | 10              | Yes                      | Yes                   |
|               | 60%          | 6/10   | 46%        | 6            | 4         | 10              | Yes                      | No                    |
|               | 80%          | 8/10   | 89%        | 8            | 2         | 10              | Yes                      | No                    |
|               | 60%          | 6/10   | 46%        | 6            | 4         | 10              | Yes                      | No                    |
|               | 80%          | 8/10   | 89%        | 8            | 2         | 10              | Yes                      | Yes                   |
|               | 50%          | 5/10   | 25%        | 5            | 5         | 10              | Yes                      | No                    |
|               | 50%          | 5/10   | 25%        | 5            | 5         | 10              | Yes                      | No                    |
|               | 60%          | 6/10   | 46%        | 6            | 4         | 10              | Yes                      | No                    |
|               | 80%          | 8/10   | 89%        | 8            | 2         | 10              | Yes                      | No                    |
|               | 80%          | 8/10   | 89%        | 8            | 2         | 10              | Yes                      | No                    |
|               | 70%          | 7/10   | 68%        | 7            | 3         | 10              | Yes                      | No                    |
|               | 60%          | 6/10   | 46%        | 6            | 4         | 10              | Yes                      | Yes                   |
|               | 70%          | 7/10   | 68%        | 7            | 3         | 10              | Yes                      | No                    |
|               | 60%          | 6/10   | 46%        | 6            | 4         | 10              | Yes                      | No                    |
|               | 80%          | 8/10   | 89%        | 8            | 2         | 10              | No                       | No                    |
|               | 80%          | 8/10   | 89%        | 8            | 2         | 10              | Yes                      | No                    |
|               | 60%          | 6/10   | 46%        | 6            | 4         | 10              | Yes                      | No                    |
|               | 80%          | 8/10   | 89%        | 8            | 2         | 10              | Yes                      | Yes                   |
|               | 80%          | 8/10   | 89%        | 8            | 2         | 10              | No                       | No                    |
|               | 60%          | 6/10   | 46%        | 6            | 4         | 10              | Yes                      | No                    |
|               | 80%          | 8/10   | 89%        | 8            | 2         | 10              | Yes                      | No                    |
|               | 50%          | 5/10   | 25%        | 5            | 5         | 10              | Yes                      | No                    |
|               | 80%          | 8/10   | 89%        | 8            | 2         | 10              | Yes                      | Yes                   |
|               | 30%          | 3/10   | 3%         | 3            | 7         | 10              | Yes                      | Yes                   |
|               | 70%          | 7/10   | 68%        | 7            | 3         | 10              | Yes                      | No                    |
|               | 70%          | 7/10   | 68%        | 7            | 3         | 10              | Yes                      | No                    |
|               | 80%          | 8/10   | 89%        | 8            | 2         | 10              | Yes                      | No                    |
|               | 30%          | 3/10   | 3%         | 3            | 7         | 10              | Yes                      | Yes                   |
|               | 60%          | 6/10   | 46%        | 6            | 4         | 10              | No                       | No                    |
|               | 70%          | 7/10   | 68%        | 7            | 3         | 10              | Yes                      | No                    |
|               | 40%          | 4/10   | 10%        | 4            | 6         | 10              | Yes                      | No                    |

Table S1 Quiz Summary

| Respondent ID | Quiz Summary |        |            | Quiz Results |           |                 | Do you know what         | Did you already       |
|---------------|--------------|--------|------------|--------------|-----------|-----------------|--------------------------|-----------------------|
|               | Score        | Points | Percentile | Correct      | Incorrect | Total_Questions | is ultra-processed food? | know this definition? |
|               | 60%          | 6/10   | 46%        | 6            | 4         | 10              | No                       | No                    |
|               | 90%          | 9/10   | 99%        | 9            | 1         | 10              | Yes                      | No                    |
|               | 60%          | 6/10   | 46%        | 6            | 4         | 10              | Yes                      | No                    |
|               | 50%          | 5/10   | 25%        | 5            | 5         | 10              | Yes                      | No                    |
|               | 90%          | 9/10   | 99%        | 9            | 1         | 10              | Yes                      | No                    |
|               | 50%          | 5/10   | 25%        | 5            | 5         | 10              | Yes                      | Yes                   |
|               | 60%          | 6/10   | 46%        | 6            | 4         | 10              | No                       | No                    |
|               | 40%          | 4/10   | 10%        | 4            | 6         | 10              | Yes                      | No                    |
|               | 90%          | 9/10   | 99%        | 9            | 1         | 10              | Yes                      | No                    |
|               | 50%          | 5/10   | 25%        | 5            | 5         | 10              | Yes                      | No                    |
|               | 50%          | 5/10   | 25%        | 5            | 5         | 10              | Yes                      | No                    |
|               | 90%          | 9/10   | 99%        | 9            | 1         | 10              | Yes                      | No                    |
|               | 30%          | 3/10   | 3%         | 3            | 7         | 10              | Yes                      | No                    |
|               | 90%          | 9/10   | 99%        | 9            | 1         | 10              | No                       | No                    |
|               | 70%          | 7/10   | 68%        | 7            | 3         | 10              | Yes                      | No                    |
|               | 60%          | 6/10   | 46%        | 6            | 4         | 10              | Yes                      | No                    |
|               | 70%          | 7/10   | 68%        | 7            | 3         | 10              | Yes                      | No                    |
|               | 40%          | 4/10   | 10%        | 4            | 6         | 10              | Yes                      | No                    |
|               | 80%          | 8/10   | 89%        | 8            | 2         | 10              | No                       | No                    |
|               | 60%          | 6/10   | 46%        | 6            | 4         | 10              | Yes                      | Yes                   |
|               | 40%          | 4/10   | 10%        | 4            | 6         | 10              | No                       | No                    |
|               | 70%          | 7/10   | 68%        | 7            | 3         | 10              | Yes                      | No                    |
|               | 50%          | 5/10   | 25%        | 5            | 5         | 10              | Yes                      | No                    |
|               | 100%         | 10/10  | 100%       | 10           | 0         | 10              | Yes                      | No                    |
|               | 80%          | 8/10   | 89%        | 8            | 2         | 10              | Yes                      | No                    |
|               | 80%          | 8/10   | 89%        | 8            | 2         | 10              | Yes                      | No                    |
|               | 70%          | 7/10   | 68%        | 7            | 3         | 10              | No                       | No                    |
|               | 70%          | 7/10   | 68%        | 7            | 3         | 10              | Yes                      | No                    |
|               | 70%          | 7/10   | 68%        | 7            | 3         | 10              | Yes                      | No                    |
|               | 60%          | 6/10   | 46%        | 6            | 4         | 10              | Yes                      | No                    |
|               | 80%          | 8/10   | 89%        | 8            | 2         | 10              | Yes                      | Yes                   |
|               | 70%          | 7/10   | 68%        | 7            | 3         | 10              | No                       | No                    |
|               | 60%          | 6/10   | 46%        | 6            | 4         | 10              | No                       | No                    |
|               | 50%          | 5/10   | 25%        | 5            | 5         | 10              | Yes                      | Yes                   |
|               | 80%          | 8/10   | 89%        | 8            | 2         | 10              | Yes                      | No                    |
|               | 60%          | 6/10   | 46%        | 6            | 4         | 10              | Yes                      | No                    |
|               | 70%          | 7/10   | 68%        | 7            | 3         | 10              | Yes                      | Yes                   |
|               | 70%          | 7/10   | 68%        | 7            | 3         | 10              | Yes                      | No                    |
|               | 60%          | 6/10   | 46%        | 6            | 4         | 10              | Yes                      | No                    |
|               | 80%          | 8/10   | 89%        | 8            | 2         | 10              | Yes                      | Yes                   |
|               | 80%          | 8/10   | 89%        | 8            | 2         | 10              | Yes                      | No                    |
|               | 50%          | 5/10   | 25%        | 5            | 5         | 10              | No                       | No                    |
|               | 80%          | 8/10   | 89%        | 8            | 2         | 10              | Yes                      | No                    |
|               | 40%          | 4/10   | 10%        | 4            | 6         | 10              | No                       | No                    |
|               | 90%          | 9/10   | 99%        | 9            | 1         | 10              | No                       | No                    |

Table S1 Quiz Summary

| Respondent ID | Quiz Summary |        |            | Quiz Results |           |                 | Do you know what         | Did you already       |
|---------------|--------------|--------|------------|--------------|-----------|-----------------|--------------------------|-----------------------|
|               | Score        | Points | Percentile | Correct      | Incorrect | Total_Questions | is ultra-processed food? | know this definition? |
|               | 80%          | 8/10   | 89%        | 8            | 2         | 10              | Yes                      | No                    |
|               | 80%          | 8/10   | 89%        | 8            | 2         | 10              | No                       | No                    |
|               | 90%          | 9/10   | 99%        | 9            | 1         | 10              | Yes                      | No                    |
|               | 90%          | 9/10   | 99%        | 9            | 1         | 10              | Yes                      | No                    |
|               | 70%          | 7/10   | 68%        | 7            | 3         | 10              | Yes                      | No                    |
|               | 50%          | 5/10   | 25%        | 5            | 5         | 10              | No                       | No                    |
|               | 80%          | 8/10   | 89%        | 8            | 2         | 10              | Yes                      | No                    |
|               | 70%          | 7/10   | 68%        | 7            | 3         | 10              | Yes                      | No                    |
|               | 70%          | 7/10   | 68%        | 7            | 3         | 10              | Yes                      | No                    |
|               | 70%          | 7/10   | 68%        | 7            | 3         | 10              | No                       | No                    |
|               | 50%          | 5/10   | 25%        | 5            | 5         | 10              | Yes                      | No                    |
|               | 70%          | 7/10   | 68%        | 7            | 3         | 10              | Yes                      | No                    |
|               | 60%          | 6/10   | 46%        | 6            | 4         | 10              | Yes                      | Yes                   |
|               | 50%          | 5/10   | 25%        | 5            | 5         | 10              | Yes                      | No                    |
|               | 80%          | 8/10   | 89%        | 8            | 2         | 10              | Yes                      | No                    |
|               | 80%          | 8/10   | 89%        | 8            | 2         | 10              | Yes                      | No                    |
|               | 70%          | 7/10   | 68%        | 7            | 3         | 10              | Yes                      | Yes                   |
|               | 90%          | 9/10   | 99%        | 9            | 1         | 10              | Yes                      | No                    |
|               | 80%          | 8/10   | 89%        | 8            | 2         | 10              | Yes                      | No                    |
|               | 80%          | 8/10   | 89%        | 8            | 2         | 10              | Yes                      | Yes                   |
|               | 90%          | 9/10   | 99%        | 9            | 1         | 10              | No                       | No                    |
|               | 70%          | 7/10   | 68%        | 7            | 3         | 10              | Yes                      | No                    |
|               | 70%          | 7/10   | 68%        | 7            | 3         | 10              | Yes                      | No                    |
|               | 70%          | 7/10   | 68%        | 7            | 3         | 10              | Yes                      | Yes                   |
|               | 60%          | 6/10   | 46%        | 6            | 4         | 10              | Yes                      | No                    |
|               | 60%          | 6/10   | 46%        | 6            | 4         | 10              | Yes                      | No                    |
|               | 30%          | 3/10   | 3%         | 3            | 7         | 10              | Yes                      | No                    |
|               | 70%          | 7/10   | 68%        | 7            | 3         | 10              | Yes                      | No                    |
|               | 80%          | 8/10   | 89%        | 8            | 2         | 10              | Yes                      | Yes                   |
|               | 60%          | 6/10   | 46%        | 6            | 4         | 10              | Yes                      | Yes                   |
|               | 60%          | 6/10   | 46%        | 6            | 4         | 10              | Yes                      | No                    |
|               | 90%          | 9/10   | 99%        | 9            | 1         | 10              | Yes                      | No                    |
|               | 60%          | 6/10   | 46%        | 6            | 4         | 10              | Yes                      | No                    |
|               | 70%          | 7/10   | 68%        | 7            | 3         | 10              | No                       | No                    |
|               | 60%          | 6/10   | 46%        | 6            | 4         | 10              | Yes                      | No                    |
|               | 80%          | 8/10   | 89%        | 8            | 2         | 10              | Yes                      | No                    |
|               | 60%          | 6/10   | 46%        | 6            | 4         | 10              | No                       | No                    |
|               | 70%          | 7/10   | 68%        | 7            | 3         | 10              | Yes                      | No                    |
|               | 60%          | 6/10   | 46%        | 6            | 4         | 10              | Yes                      | No                    |
|               | 80%          | 8/10   | 89%        | 8            | 2         | 10              | Yes                      | No                    |
|               | 50%          | 5/10   | 25%        | 5            | 5         | 10              | Yes                      | No                    |
|               | 40%          | 4/10   | 10%        | 4            | 6         | 10              | Yes                      | Yes                   |
|               | 60%          | 6/10   | 46%        | 6            | 4         | 10              | Yes                      | No                    |
|               | 60%          | 6/10   | 46%        | 6            | 4         | 10              | Yes                      | No                    |
|               | 60%          | 6/10   | 46%        | 6            | 4         | 10              | Yes                      | No                    |

Table S1 Quiz Summary

| Respondent ID | Quiz Summary |        |            | Quiz Results |           |                 | Do you know what         | Did you already       |
|---------------|--------------|--------|------------|--------------|-----------|-----------------|--------------------------|-----------------------|
|               | Score        | Points | Percentile | Correct      | Incorrect | Total_Questions | is ultra-processed food? | know this definition? |
|               | 80%          | 8/10   | 89%        | 8            | 2         | 10              | No                       | No                    |
|               | 80%          | 8/10   | 89%        | 8            | 2         | 10              | No                       | No                    |
|               | 100%         | 10/10  | 100%       | 10           | 0         | 10              | No                       | No                    |
|               | 100%         | 10/10  | 100%       | 10           | 0         | 10              | No                       | No                    |
|               | 50%          | 5/10   | 25%        | 5            | 5         | 10              | No                       | No                    |
|               | 50%          | 5/10   | 25%        | 5            | 5         | 10              | Yes                      | Yes                   |
|               | 50%          | 5/10   | 25%        | 5            | 5         | 10              | Yes                      | No                    |
|               | 50%          | 5/10   | 25%        | 5            | 5         | 10              | Yes                      | Yes                   |
|               | 70%          | 7/10   | 68%        | 7            | 3         | 10              | Yes                      | Yes                   |
|               | 90%          | 9/10   | 99%        | 9            | 1         | 10              | No                       | No                    |
|               | 70%          | 7/10   | 68%        | 7            | 3         | 10              | Yes                      | No                    |
|               | 60%          | 6/10   | 46%        | 6            | 4         | 10              | No                       | No                    |
|               | 60%          | 6/10   | 46%        | 6            | 4         | 10              | Yes                      | No                    |
|               | 70%          | 7/10   | 68%        | 7            | 3         | 10              | No                       | No                    |
|               | 80%          | 8/10   | 89%        | 8            | 2         | 10              | Yes                      | Yes                   |
|               | 70%          | 7/10   | 68%        | 7            | 3         | 10              | Yes                      | No                    |
|               | 70%          | 7/10   | 68%        | 7            | 3         | 10              | Yes                      | No                    |
|               | 60%          | 6/10   | 46%        | 6            | 4         | 10              | Yes                      | Yes                   |
|               | 80%          | 8/10   | 89%        | 8            | 2         | 10              | Yes                      | Yes                   |
|               | 60%          | 6/10   | 46%        | 6            | 4         | 10              | Yes                      | No                    |
|               | 50%          | 5/10   | 25%        | 5            | 5         | 10              | Yes                      | No                    |
|               | 50%          | 5/10   | 25%        | 5            | 5         | 10              | Yes                      | Yes                   |
|               | 60%          | 6/10   | 46%        | 6            | 4         | 10              | No                       | No                    |
|               | 50%          | 5/10   | 25%        | 5            | 5         | 10              | No                       | No                    |
|               | 80%          | 8/10   | 89%        | 8            | 2         | 10              | Yes                      | No                    |
|               | 70%          | 7/10   | 68%        | 7            | 3         | 10              | Yes                      | No                    |
|               | 80%          | 8/10   | 89%        | 8            | 2         | 10              | Yes                      | Yes                   |
|               | 50%          | 5/10   | 25%        | 5            | 5         | 10              | Yes                      | No                    |
|               | 40%          | 4/10   | 10%        | 4            | 6         | 10              | Yes                      | No                    |
|               | 70%          | 7/10   | 68%        | 7            | 3         | 10              | Yes                      | No                    |
|               | 70%          | 7/10   | 68%        | 7            | 3         | 10              | No                       | No                    |
|               | 60%          | 6/10   | 46%        | 6            | 4         | 10              | Yes                      | No                    |
|               | 60%          | 6/10   | 46%        | 6            | 4         | 10              | No                       | Yes                   |
|               | 80%          | 8/10   | 89%        | 8            | 2         | 10              | Yes                      | No                    |
|               | 70%          | 7/10   | 68%        | 7            | 3         | 10              | Yes                      | No                    |
|               | 70%          | 7/10   | 68%        | 7            | 3         | 10              | Yes                      | No                    |
|               | 80%          | 8/10   | 89%        | 8            | 2         | 10              | Yes                      | No                    |
|               | 60%          | 6/10   | 46%        | 6            | 4         | 10              | Yes                      | No                    |
|               | 60%          | 6/10   | 46%        | 6            | 4         | 10              | Yes                      | No                    |
|               | 70%          | 7/10   | 68%        | 7            | 3         | 10              | Yes                      | Yes                   |
|               | 80%          | 8/10   | 89%        | 8            | 2         | 10              | Yes                      | No                    |
|               | 80%          | 8/10   | 89%        | 8            | 2         | 10              | Yes                      | No                    |
|               | 80%          | 8/10   | 89%        | 8            | 2         | 10              | Yes                      | No                    |
|               | 70%          | 7/10   | 68%        | 7            | 3         | 10              | Yes                      | No                    |
|               | 50%          | 5/10   | 25%        | 5            | 5         | 10              | Yes                      | No                    |

Table S1 Quiz Summary

| Respondent ID | Quiz Summary |        |            | Quiz Results |           |                 | Do you know what         | Did you already       |
|---------------|--------------|--------|------------|--------------|-----------|-----------------|--------------------------|-----------------------|
|               | Score        | Points | Percentile | Correct      | Incorrect | Total_Questions | is ultra-processed food? | know this definition? |
|               | 70%          | 7/10   | 68%        | 7            | 3         | 10              | Yes                      | No                    |
|               | 60%          | 6/10   | 46%        | 6            | 4         | 10              | Yes                      | No                    |
|               | 70%          | 7/10   | 68%        | 7            | 3         | 10              | Yes                      | No                    |
|               | 60%          | 6/10   | 46%        | 6            | 4         | 10              | Yes                      | No                    |
|               | 70%          | 7/10   | 68%        | 7            | 3         | 10              | Yes                      | No                    |
|               | 50%          | 5/10   | 25%        | 5            | 5         | 10              | Yes                      | No                    |
|               | 60%          | 6/10   | 46%        | 6            | 4         | 10              | Yes                      | No                    |
|               | 50%          | 5/10   | 25%        | 5            | 5         | 10              | Yes                      | No                    |
|               | 90%          | 9/10   | 99%        | 9            | 1         | 10              | Yes                      | No                    |
|               | 80%          | 8/10   | 89%        | 8            | 2         | 10              | Yes                      | No                    |
|               | 80%          | 8/10   | 89%        | 8            | 2         | 10              | Yes                      | Yes                   |
|               | 80%          | 8/10   | 89%        | 8            | 2         | 10              | No                       | No                    |
|               | 60%          | 6/10   | 46%        | 6            | 4         | 10              | Yes                      | No                    |
|               | 40%          | 4/10   | 10%        | 4            | 6         | 10              | Yes                      | Yes                   |
|               | 70%          | 7/10   | 68%        | 7            | 3         | 10              | Yes                      | No                    |
|               | 60%          | 6/10   | 46%        | 6            | 4         | 10              | Yes                      | No                    |
|               | 50%          | 5/10   | 25%        | 5            | 5         | 10              | Yes                      | No                    |
|               | 70%          | 7/10   | 68%        | 7            | 3         | 10              | Yes                      | No                    |
|               | 70%          | 7/10   | 68%        | 7            | 3         | 10              | Yes                      | Yes                   |
|               | 90%          | 9/10   | 99%        | 9            | 1         | 10              | Yes                      | No                    |
|               | 50%          | 5/10   | 25%        | 5            | 5         | 10              | Yes                      | Yes                   |
|               | 70%          | 7/10   | 68%        | 7            | 3         | 10              | Yes                      | No                    |
|               | 50%          | 5/10   | 26%        | 5            | 5         | 10              | Yes                      | Yes                   |
|               | 90%          | 9/10   | 99%        | 9            | 1         | 10              | Yes                      | Yes                   |
|               | 60%          | 6/10   | 46%        | 6            | 4         | 10              | No                       | No                    |
|               | 80%          | 8/10   | 89%        | 8            | 2         | 10              | No                       | No                    |
|               | 40%          | 4/10   | 10%        | 4            | 6         | 10              | Yes                      | No                    |
|               | 50%          | 5/10   | 26%        | 5            | 5         | 10              | Yes                      | No                    |
|               | 90%          | 9/10   | 99%        | 9            | 1         | 10              | Yes                      | No                    |
|               | 50%          | 5/10   | 26%        | 5            | 5         | 10              | Yes                      | No                    |
|               | 80%          | 8/10   | 89%        | 8            | 2         | 10              | Yes                      | No                    |
|               | 60%          | 6/10   | 46%        | 6            | 4         | 10              | Yes                      | Yes                   |
|               | 70%          | 7/10   | 68%        | 7            | 3         | 10              | Yes                      | No                    |
|               | 60%          | 6/10   | 46%        | 6            | 4         | 10              | Yes                      | No                    |
|               | 60%          | 6/10   | 46%        | 6            | 4         | 10              | Yes                      | No                    |
|               | 50%          | 5/10   | 26%        | 5            | 5         | 10              | No                       | Yes                   |
|               | 70%          | 7/10   | 68%        | 7            | 3         | 10              | No                       | No                    |
|               | 80%          | 8/10   | 89%        | 8            | 2         | 10              | Yes                      | No                    |
|               | 80%          | 8/10   | 89%        | 8            | 2         | 10              | Yes                      | No                    |
